# Supplementary material for: Luminescent bichromophoric spiroindolones – synthesis and electronic properties
Source: Royal Society of Chemistry journal article supplement (doi:10.1039/c1ob05703k), 2011-01-01
Supplement: c1ob05703k.pdf [file c1ob05703k.pdf]

## ***Supporting Information***

# **Luminescent bichromophoric spiroindolones - synthesis and electronic properties**

Jan Schönhaber, and Thomas J. J. Müller\*

Institut für Organische Chemie und Makromolekulare Chemie, Heinrich-Heine-Universität  
Düsseldorf, Universitätsstr. 1, D-40225 Düsseldorf, Germany

[ThomasJJ.Mueller@uni-duesseldorf.de](mailto:ThomasJJ.Mueller@uni-duesseldorf.de)

### **Table of Content:**

|                                                            |    |
|------------------------------------------------------------|----|
| General Informations                                       | 2  |
| Synthesis of Starting Material <b>1a-e</b> and <b>2a-d</b> | 3  |
| Synthesis of Spirocyclic Chromophores <b>4a-m</b>          | 6  |
| NMR-Spectra of compounds <b>4a-m</b>                       | 14 |
| UV/Vis- and emission spectra of <b>4a-m</b>                | 27 |
| Computational details                                      | 34 |

### General Informations:

The catalyses were performed in degassed THF which was dried using MBraun system MB-SPS-800. All reactions were carried out in oven-dried Schlenk glassware using septa and syringes under argon atmosphere. The purification of products was performed on silica gel 60 (0.015-0.040 mm) of Macherey Nagel using flash technique and under pressure of 2 bar. The crude mixtures were adsorbed on Celite 545 (0.02-0.10 mm) before chromatographic purification. The  $^1\text{H}$  and  $^{13}\text{C}$  NMR spectra were recorded on a Bruker DRX 500 spectrometer and the resonance of the solvent was locked as internal standard. The multiplicities of signals were abbreviated as s (singlet), d (doublet), t (triplet), dd (doublet of doublets), m (multiplet) and corresponding combinations. The type of carbon atoms ( $\text{CH}_3$ ,  $\text{CH}_2$ ,  $\text{CH}$ ,  $\text{C}_{\text{quat}}$ ) was determined on the basis of DEPT-135 NMR spectra. EI mass spectra were measured on Finnigan MAT 8200 spectrometer. IR spectra were obtained on a Bruker Vector 22 FT-IR. The solids were measured as KBr pellets and the oils in the form of films on KBr plates. The intensity of signals is abbreviated as s (strong), m (medium) and w (weak). The UV/Vis Spectra were recorded on a Hewlett Packard 84252 A Diode Array Spectrophotometer ( $c \sim 0.5 \mu\text{M}$ ) and the Emission spectra were recorded on a Perkin Elmer LS55 spectrometer. Combustion analyses were carried out on a Perkin Elmer Series II Analyser 2400 in the microanalytical laboratory of the Institut für Pharmazeutische und Medizinische Chemie der Heinrich-Heine-Universität Düsseldorf. Compounds **1a-e** and **2a-c** were prepared as previously reported.<sup>1</sup>

## Synthesis of Starting Materials 1a-e:

**1a:** See Reference 1) and 2) within this Supporting Information.

**1b:** M. p. 140 °C; <sup>1</sup>H-NMR (CDCl<sub>3</sub>, 500 MHz): δ 1.39 (s, 9H), 7.05 (t, <sup>3</sup>J<sub>H,H</sub> = 7.5 Hz, 1H), 7.25 (m, 3H), 7.35 (m, 4H), 7.86 (d, <sup>3</sup>J<sub>H,H</sub> = 8.0 Hz, 1H); <sup>13</sup>C-NMR (CDCl<sub>3</sub>, 126 MHz): δ 28.1 (CH<sub>3</sub>), 83.3 (C<sub>quart.</sub>), 84.4 (C<sub>quart.</sub>), 94.0 (C<sub>quart.</sub>), 100.1 (C<sub>quart.</sub>), 120.3 (C<sub>quart.</sub>), 128.7 (CH), 129.4 (CH), 130.0 (CH), 130.2 (CH), 133.2 (CH), 139.7 (CH), 141.0 (C<sub>quart.</sub>), 150.1 (C<sub>quart.</sub>), 153.0 (C<sub>quart.</sub>); EI MS (70 eV, *m/z* (%)): 347 ([M-Boc]<sup>+</sup>, 4), 245 (14), 220 (38), 129 (100), 101 (11), 75 (26), 57 (78); IR (KBr, [cm<sup>-1</sup>]):  $\tilde{\nu}$  = 3066 (w), 2981 (m), 2932 (w), 2207 (s), 1747 (s), 1659 (s), 1578 (w), 1489 (w), 1468 (m), 1443 (w), 1393 (w), 1328 (m), 1280 (s), 1254 (m), 1152 (s), 1119 (m), 1096 (m), 1040 (w), 1022 (w), 952 (m), 847 (m), 787 (w), 755 (m), 731 (m), 706 (w), 690 (m), 671 (w), 627 (w), 538 (w), 516 (w); Combustion Analysis: Calcd. for C<sub>20</sub>H<sub>18</sub>INO<sub>3</sub> (447.3): C 53.71, H 4.06, N 3.13: Found: C 53.87, H 4.18, N 3.09.

**1c:** M. p. 80 °C; <sup>1</sup>H-NMR (CDCl<sub>3</sub>, 500 MHz): δ 2.91 (s, 6H), 7.06 (d, <sup>3</sup>J<sub>H,H</sub> = 7.2 Hz, 2H), 7.24 (m, 4H), 7.36 (t, <sup>3</sup>J<sub>H,H</sub> = 7.5 Hz, 1H), 7.47 (m, 3H), 7.64 (t, <sup>3</sup>J<sub>H,H</sub> = 8.5 Hz, 1H), 8.06 (dd, <sup>3</sup>J<sub>H,H</sub> = 8.0 Hz, *J*<sub>H,H</sub> = 1.2 Hz, 1H), 8.36 (d, <sup>3</sup>J<sub>H,H</sub> = 8.5 Hz, 1H), 8.69 (t, <sup>3</sup>J<sub>H,H</sub> = 8.0 Hz, 2H); <sup>13</sup>C-NMR (CDCl<sub>3</sub>, 126 MHz): δ 45.7 (CH<sub>3</sub>), 82.2 (C<sub>quart.</sub>), 93.6 (C<sub>quart.</sub>), 103.5 (C<sub>quart.</sub>), 115.5 (CH), 119.3 (C<sub>quart.</sub>), 120.1 (CH), 123.4 (CH), 128.6 (CH), 128.7 (CH), 129.1 (CH), 130.1 (C<sub>quart.</sub>), 130.5 (C<sub>quart.</sub>), 131.1 (CH), 131.5 (CH), 132.5 (CH), 133.1 (CH), 133.1 (CH), 134.3 (C<sub>quart.</sub>), 134.4 (CH), 139.6 (C<sub>quart.</sub>), 140.6 (CH), 152.2 (C<sub>quart.</sub>); EI MS (70 eV, *m/z* (%)): 580 ([M]<sup>+</sup>, 66), 330 (90), 271 (29), 220 (22), 170 (76) 129 (100); IR (KBr, [cm<sup>-1</sup>]):  $\tilde{\nu}$  = 2942 (w), 2832 (w), 2788 (w), 2215 (s), 1683 (s), 1572 (m), 1489 (w), 1462 (m), 1365 (m), 1287 (m), 1234 (w), 1202 (w), 1149 (s), 1058 (m), 1021 (w), 973 (w), 918 (w), 837 (w), 793 (m), 758 (m), 722 (w), 694 (m), 626 (s), 584 (s), 566 (m), 535 (m); UV/Vis (CH<sub>2</sub>Cl<sub>2</sub>): λ<sub>abs</sub> (ε): 362 nm (25000); Combustion Analysis: Calcd. for C<sub>27</sub>H<sub>21</sub>IN<sub>2</sub>O<sub>3</sub>S (580.4): C 55.87, H 3.65, N 4.83: Found: C 55.62, H 3.50, N 4.74.

**1d:** M. p. 101 °C; <sup>1</sup>H-NMR (CDCl<sub>3</sub>, 500 MHz): δ 2.87 (s, 6H), 6.94 (d, <sup>3</sup>J<sub>H,H</sub> = 8.5 Hz, 2H), 7.19 (m, 4H), 7.39 (d, <sup>3</sup>J<sub>H,H</sub> = 7.0 Hz, 1H), 7.44 (m, 2H), 7.60 (t, <sup>3</sup>J<sub>H,H</sub> = 8.0 Hz, 1H), 8.02

(d,  $^3J_{\text{H,H}} = 8.0$  Hz, 1H), 8.30 (d,  $^3J_{\text{H,H}} = 8.5$  Hz, 1H), 8.64 (d,  $^3J_{\text{H,H}} = 7.5$  Hz, 2H);  $^{13}\text{C}$ -NMR ( $\text{CDCl}_3$ , 126 MHz):  $\delta$  45.7 ( $\text{CH}_3$ ), 83.9 ( $\text{C}_{\text{quart.}}$ ), 92.2 ( $\text{C}_{\text{quart.}}$ ), 103.5 ( $\text{C}_{\text{quart.}}$ ), 115.5 (CH), 117.8 ( $\text{C}_{\text{quart.}}$ ), 120.0 (CH), 123.4 (CH), 128.7 (CH), 129.1 (CH), 129.2 (CH), 130.1 ( $\text{C}_{\text{quart.}}$ ), 130.5 ( $\text{C}_{\text{quart.}}$ ), 131.6 (CH), 132.6 (CH), 133.1 (CH), 134.2 (CH), 134.5 (CH), 137.5 ( $\text{C}_{\text{quart.}}$ ), 139.5 ( $\text{C}_{\text{quart.}}$ ), 140.6 (CH), 152.0 ( $\text{C}_{\text{quart.}}$ ), 152.1 ( $\text{C}_{\text{quart.}}$ ); EI MS (70 eV,  $m/z$  (%)): 614 ( $[\text{M}]^+$ , 21), 264 (100), 305 (15), 216 (13), 170 (72), 163 (80), 154 (29), 127 (24), 99 (11); IR (KBr,  $[\text{cm}^{-1}]$ ):  $\tilde{\nu} = 2939$  (w), 2222 (s), 1676 (s), 1637 (w), 1571 (w), 1543 (w), 1508 (w), 1476 (m), 1465 (m), 1400 (w), 1362 (s), 1298 (s), 1182 (m), 1163 (s), 1089 (m), 1053 (m), 1013 (w), 975 (w), 946 (w), 917 (w), 868 (w), 831 (m), 787 (w), 756 (w), 725 (w), 695 (m), 620 (s), 588 (s), 564 (m), 533 (m); UV/Vis ( $\text{CH}_2\text{Cl}_2$ ):  $\lambda_{\text{abs}}$  ( $\epsilon$ ): 366 nm (25500); Combustion Analysis: Calcd. for  $\text{C}_{27}\text{H}_{20}\text{ClIN}_2\text{O}_3\text{S}$  (614.9): C 52.74, H 3.28, N 4.56: Found: C 52.46, H 3.24, N 4.51.

**1e**: M. p. 82 °C;  $^1\text{H}$ -NMR ( $\text{CDCl}_3$ , 500 MHz):  $\delta$  2.88 (s, 6H), 3.74 (s, 3H), 6.71 (d,  $^3J_{\text{H,H}} = 8.8$  Hz, 2H), 6.95 (d,  $^3J_{\text{H,H}} = 8.8$  Hz, 2H), 7.20 (m, 3H), 7.43 (m, 3H), 7.61 (t,  $^3J_{\text{H,H}} = 8.0$  Hz, 1H), 8.02 (d,  $^3J_{\text{H,H}} = 7.8$  Hz, 1H), 8.35 (d,  $^3J_{\text{H,H}} = 8.5$  Hz, 1H), 8.66 (d,  $^3J_{\text{H,H}} = 7.5$  Hz, 1H);  $^{13}\text{C}$ -NMR ( $\text{CDCl}_3$ , 126 MHz):  $\delta$  45.7 ( $\text{CH}_3$ ), 55.6 ( $\text{CH}_3$ ), 82.0 ( $\text{C}_{\text{quart.}}$ ), 94.8 ( $\text{C}_{\text{quart.}}$ ), 103.7 ( $\text{C}_{\text{quart.}}$ ), 111.1 ( $\text{C}_{\text{quart.}}$ ), 114.4 (CH), 115.5 (CH), 128.5 (CH), 129.0 (CH), 130.5 ( $\text{C}_{\text{quart.}}$ ), 131.4 (CH), 132.3 (CH), 133.6 (CH), 134.4 (CH), 134.5 ( $\text{C}_{\text{quart.}}$ ), 135.1 (CH), 139.8 ( $\text{C}_{\text{quart.}}$ ), 140.6 (CH), 152.4 ( $\text{C}_{\text{quart.}}$ ), 161.2 ( $\text{C}_{\text{quart.}}$ ); EI MS (70 eV,  $m/z$  (%)): 610 ( $[\text{M}]^+$ , 32), 360 (31), 349 (16), 334 (16), 302 (34), 250 (15), 222 (11), 170 (22), 159 (100), 71 (12); IR (KBr,  $[\text{cm}^{-1}]$ ):  $\tilde{\nu} = 2938$  (w), 2190 (b), 1774 (w), 1719 (w), 1676 (s), 1601 (s), 1570 (s), 1508 (s), 1459 (m), 1398 (w), 1363 (m), 1289 (m), 1254 (s), 1145 (s), 1056 (w), 1021 (m), 973 (w), 917 (w), 834 (m), 791 (m), 721 (w), 699 (m), 622 (s), 592 (m), 858 (m), 537 (m); UV/Vis ( $\text{CH}_2\text{Cl}_2$ ):  $\lambda_{\text{abs}}$  ( $\epsilon$ ): 367 nm (28200); Combustion Analysis: Calcd. for  $\text{C}_{27}\text{H}_{20}\text{ClIN}_2\text{O}_3\text{S}$  (610.5): C 55.09, H 3.80, N 4.59: Found: C 54.81, H 3.67, N 4.59.

**2a**:<sup>1</sup>

**2b**:<sup>1</sup>

**2c**:<sup>1</sup>

**2d:**  $^1\text{H}$  NMR (500 MHz,  $\text{CDCl}_3$ ):  $\delta$  1.51 (s, 3H), 1.74 (s, 3H), 2.65 (d,  $^2J_{\text{H,H}} = 2.4$  Hz, 1H), 4.15 (m, 2H), 5.40 (m, 1H), 6.65 (d,  $^4J_{\text{H,H}} = 2.4$  Hz, 1H), 7.49 (m, 4H), 8.00 (d,  $^3J_{\text{H,H}} = 8.4$  Hz, 2H), 8.46 (s, 1H), 8.65 (d,  $^3J_{\text{H,H}} = 8.9$  Hz, 2H);  $^{13}\text{C}$  NMR (126 MHz,  $\text{CDCl}_3$ ):  $\delta$  18.2 ( $\text{CH}_3$ ), 26.1 ( $\text{CH}_3$ ), 64.4 (CH), 65.3 ( $\text{CH}_2$ ), 75.8 (CH), 83.0 ( $\text{C}_{\text{quart.}}$ ), 120.8 (CH), 124.9 (CH), 125.1 (CH), 126.2 (CH), 129.1 ( $\text{C}_{\text{quart.}}$ ), 129.3 (CH), 129.9 ( $\text{C}_{\text{quart.}}$ ), 131.8 ( $\text{C}_{\text{quart.}}$ ), 138.9 ( $\text{C}_{\text{quart.}}$ ); EI Ms (70eV, m/z, (%)): 300 ( $[\text{M}]^+$ , 24), 215 ( $[\text{M}-\text{C}_5\text{H}_9\text{O}]^+$ , 100), 69 ( $[\text{M}-\text{C}_{17}\text{H}_{11}\text{O}]^+$ , 34), 55 ( $[\text{M}-\text{C}_{18}\text{H}_{13}\text{O}]^+$ , 30); IR (KBr):  $\tilde{\nu} = 3581$  (w), 3733 (w), 3276 (m), 2911 (m), 2116 (m), 1677 (m), 1622 (m), 1524 (m), 1446 (s), 1383 (m), 1341 (m), 1302 (w), 1288 (m), 1251 (w), 1229 (w), 1202 (w), 1182 (w), 1159 (w), 1122 (w), 1054 (s), 993 (w), 967 (m), 920 (m), 893 (s), 870 (m), 849 (m), 788 (s), 757 (w), 729 (s), 711 (s), 676 (s), 656 (w), 643 (s), 596 (m), 545 (m); Combustion Analysis: Calcd. for  $\text{C}_{22}\text{H}_{20}\text{O} \cdot 0.05 \text{C}_4\text{H}_{10}\text{O}$  (300.2+3.7): C 86.80, H 7.06; Found: C 87.06, H 7.36.

## General Procedure for the Synthesis of Spirocyclic Chromophores and Bichromophores:

In an argon flushed oven-dried screw-cap vessel, 2-iodophenylalkynylamide **1** (1.50 mmol), and propargyl prenyl ether **2** (1.65 mmol) were dissolved in a mixture of dry THF (6 mL) and dry triethylamine (6 mL). Then the reaction mixture was degassed with Argon for 5 min before PdCl<sub>2</sub>(PPh<sub>3</sub>)<sub>2</sub> (5 mol%) and CuI (5 mol%) were subsequently added. First, the reaction was stirred at room temperature for 1 h and was then heated to 130 °C for 16 h. After cooling to room temperature the solvents were removed in vacuo and the residue was chromatographed on silica gel (*n*-hexane/ethyl acetate + 5 vol% of triethylamine). After recrystallization from dichloromethane/*n*-hexane the spirocyclic chromophores were obtained as pale yellow powders.

### **3:**<sup>1</sup>

**4a:** M. p. 186 °C; <sup>1</sup>H NMR (500 MHz, CDCl<sub>3</sub>): δ 0.63 (s, 3H), 1.23 (s, 3H), 1.55 (s, 9H), 3.94 (m, 1H), 4.22 (m, 1H), 4.50 (t, <sup>3</sup>J<sub>H,H</sub> = 9.0 Hz, 1H), 6.78 (m, 2H), 7.06 (s, 1H), 7.10 (m, 3H), 7.19 (t, <sup>3</sup>J<sub>H,H</sub> = 7.5 Hz, 1H), 7.30 (d, <sup>3</sup>J<sub>H,H</sub> = 7.5 Hz, 1H), 7.38 (m, 4H), 7.68 (d, <sup>3</sup>J<sub>H,H</sub> = 8.0 Hz, 2H), 7.88 (d, <sup>3</sup>J<sub>H,H</sub> = 8.0 Hz, 1H); <sup>13</sup>C NMR (126 MHz, CDCl<sub>3</sub>): δ 17.2 (CH<sub>3</sub>), 22.3 (CH<sub>3</sub>), 28.3 (CH<sub>3</sub>), 40.1 (C<sub>quat.</sub>), 48.1 (CH), 62.8 (C<sub>quat.</sub>), 70.4 (CH<sub>2</sub>), 84.3 (C<sub>quat.</sub>), 110.2 (C<sub>quat.</sub>), 114.8 (CH), 122.9 (CH), 124.3 (CH), 125.9 (CH), 126.6 (CH), 127.1 (CH), 127.5 (CH), 128.9 (CH), 128.8 (CH), 128.9 (CH), 129.2 (CH), 131.2 (C<sub>quat.</sub>), 131.6 (C<sub>quat.</sub>), 135.4 (C<sub>quat.</sub>), 140.0 (C<sub>quat.</sub>), 141.8 (C<sub>quat.</sub>), 149.5 (C<sub>quat.</sub>), 152.7 (C<sub>quat.</sub>), 174.9 (C<sub>quat.</sub>); EI Ms (70 eV, m/z, (%)): 519 ([M]<sup>+</sup>, 46), 419 ([M-Boc]<sup>+</sup>, 59), 330 (16), 314 (17), 261 (21), 105 (100), 77 (23), 57 (50); IR (KBr):  $\tilde{\nu}$  = 2978 (w), 1769 (m), 1733 (s), 1628 (w), 1601 (w), 1491 (w), 1476 (m), 1463 (m), 1395 (w), 1370 (w), 1348 (m), 1290 (m), 1252 (m), 1149 (s), 1091 (m), 1067 (w), 1027 (w), 1001 (w), 957 (w), 921 (w), 844 (w), 768 (s), 697 (m), 672 (w), 635 (w), 598 (w); UV/Vis (CH<sub>2</sub>Cl<sub>2</sub>): λ<sub>max.</sub> (ε) 348 (38300); Combustion Analysis: Calcd. for C<sub>34</sub>H<sub>33</sub>NO<sub>4</sub> (519.6): C 78.59, H 6.40, N 2.70. Found: C 78.38, H 6.26, N 2.67.

**4b:** M. p. 123 °C; <sup>1</sup>H NMR (500 MHz, CDCl<sub>3</sub>): δ 0.63 (s, 3H), 1.22 (s, 3H), 1.55 (s, 9H), 3.93 (m, 1H), 4.20 (dd, <sup>3</sup>J<sub>H,H</sub> = 8.5 Hz, <sup>2</sup>J<sub>H,H</sub> = 12.5 Hz, 1H), 4.49 (m, 1H), 6.77 (m, 2H), 7.00 (s, 1H), 7.10 (m, 3H), 7.19 (d, <sup>3</sup>J<sub>H,H</sub> = 7.5 Hz, 1H), 7.28 (d, <sup>3</sup>J<sub>H,H</sub> = 7.0 Hz, 1H), 7.37

(d,  $^3J_{\text{H,H}} = 8.5$  Hz, 3H), 7.61 (d,  $^3J_{\text{H,H}} = 8.5$  Hz, 2H), 7.88 (d,  $^3J_{\text{H,H}} = 8.0$  Hz, 1H);  $^{13}\text{C}$  NMR (126 MHz,  $\text{CDCl}_3$ ):  $\delta$  17.2 ( $\text{CH}_3$ ), 22.3 ( $\text{CH}_3$ ), 22.8 ( $\text{CH}_3$ ), 28.3 ( $\text{CH}_3$ ), 40.1 ( $\text{C}_{\text{quat.}}$ ), 48.1 ( $\text{CH}$ ), 62.7 ( $\text{C}_{\text{quat.}}$ ), 70.5 ( $\text{CH}_2$ ), 84.4 ( $\text{C}_{\text{quat.}}$ ), 110.7 ( $\text{C}_{\text{quat.}}$ ), 114.9 ( $\text{CH}$ ), 122.5 ( $\text{CH}$ ), 124.3 ( $\text{CH}$ ), 125.9 ( $\text{CH}$ ), 126.6 ( $\text{CH}$ ), 127.3 ( $\text{CH}$ ), 128.6 ( $\text{CH}$ ), 128.7 ( $\text{CH}$ ), 129.0 ( $\text{CH}$ ), 129.0 ( $\text{CH}$ ), 129.6 ( $\text{C}_{\text{quat.}}$ ), 131.4 ( $\text{C}_{\text{quat.}}$ ), 134.9 ( $\text{C}_{\text{quat.}}$ ), 136.1 ( $\text{C}_{\text{quat.}}$ ), 140.0 ( $\text{C}_{\text{quat.}}$ ), 141.7 ( $\text{C}_{\text{quat.}}$ ), 149.4 ( $\text{C}_{\text{quat.}}$ ), 151.5 ( $\text{C}_{\text{quat.}}$ ), 174.8 ( $\text{C}_{\text{quat.}}$ ); EI Ms: (70 eV, m/z, (%)): 553 ( $[\text{M}]^+$ , 6), 453 ( $[\text{M}-\text{Boc}]^+$ , 10), 86 (11), 84 (23), 71 (16), 69 (24), 67 (11), 57 ( $[\text{C}_4\text{H}_9]^+$ , 95), 56 (97), 55 (30), 43 (84), 42 (59), 41 (100); IR (KBr):  $\tilde{\nu} = 2954$  (w), 1769 (s), 1728 (s), 1599 (w), 1489 (m), 1475 (m), 1465 (m), 1394 (w), 1370 (w), 1345 (m), 1289 (s), 1252 (m), 1148 (s), 1091 (m), 1078 (m), 1010 (w), 959 (w), 835 (w), 769 (w), 698 (w), 600 (w); UV/Vis ( $\text{CH}_2\text{Cl}_2$ ):  $\lambda_{\text{max}}$  ( $\epsilon$ ) 350 (17300); Combustion Analysis: Calcd. for  $\text{C}_{34}\text{H}_{32}\text{ClNO}_4$  (554.1): C 73.70, H 5.82, N 2.53; Found.: C 73.78, H 6.76, N 2.31.

**4c**: M. p. 157 °C;  $^1\text{H}$  NMR (500 MHz,  $\text{CDCl}_3$ ):  $\delta$  0.90 (s, 3H), 1.39 (s, 3H), 1.55 (s, 9H), 3.85 (s, 3H), 3.85 (m, 1H), 4.58 (m, 1H), 4.88 (m, 1H), 6.45 (s, 1H), 6.82 (d,  $^3J_{\text{H,H}} = 7.5$  Hz, 2H), 6.87 (d,  $^3J_{\text{H,H}} = 8.5$  Hz, 2H), 6.91 (m, 2H), 7.18 (m, 2H), 7.34 (d,  $^3J_{\text{H,H}} = 7.5$  Hz, 1H), 7.45 (t,  $^3J_{\text{H,H}} = 8.0$  Hz, 1H), 7.89 (d,  $^3J_{\text{H,H}} = 8.5$  Hz, 2H), 7.94 (d,  $^3J_{\text{H,H}} = 8.0$  Hz, 1H);  $^{13}\text{C}$  NMR (126 MHz,  $\text{CDCl}_3$ ):  $\delta$  19.1 ( $\text{CH}_3$ ), 22.4 ( $\text{CH}_3$ ), 28.2 ( $\text{CH}_3$ ), 46.0 ( $\text{C}_{\text{quat.}}$ ), 51.6 ( $\text{CH}$ ), 55.6 ( $\text{CH}_3$ ), 60.2 ( $\text{CH}_2$ ), 62.9 ( $\text{C}_{\text{quat.}}$ ), 85.0 ( $\text{C}_{\text{quat.}}$ ), 113.8 ( $\text{CH}$ ), 115.9 ( $\text{CH}$ ), 122.6 ( $\text{C}_{\text{quat.}}$ ), 124.9 ( $\text{CH}$ ), 125.1 ( $\text{CH}$ ), 126.5 ( $\text{CH}$ ), 129.0 ( $\text{CH}$ ), 129.4 ( $\text{CH}$ ), 129.7 ( $\text{CH}$ ), 130.1 ( $\text{CH}$ ), 131.8 ( $\text{CH}$ ), 138.5 ( $\text{C}_{\text{quat.}}$ ), 140.6 ( $\text{C}_{\text{quat.}}$ ), 149.0 ( $\text{C}_{\text{quat.}}$ ), 157.2 ( $\text{C}_{\text{quat.}}$ ), 163.6 ( $\text{C}_{\text{quat.}}$ ), 173.5 ( $\text{C}_{\text{quat.}}$ ); EI Ms: (70 eV, m/z, (%)): 549 ( $[\text{M}]^+$ , 3), 449 ( $[\text{M}-\text{Boc}]^+$ , 19), 261 (13), 233 (12), 204 (11), 152 (25), 135 (100), 105 (11); IR (KBr):  $\tilde{\nu} = 2972$  (w), 1719 (w), 1655 (w), 1605 (m), 1543 (w), 1510 (w), 1460 (m), 1343 (w), 1255 (m), 1150 (bs), 1100 (m), 1029 (w), 843 (w), 770 (w), 698 (w); UV/Vis ( $\text{CH}_2\text{Cl}_2$ ):  $\lambda_{\text{max}}$  ( $\epsilon$ ) 350 (18900); Combustion Analysis: Calcd. for  $\text{C}_{35}\text{H}_{35}\text{NO}_5 \cdot 0.1 \text{CH}_2\text{Cl}_2$  (549.7+8.5): C 69.62, H 5.97, N 2.27; Found.: C 69.75, H 5.67, N 2.20.

**4d**: M. p. 248 °C;  $^1\text{H}$ -NMR ( $\text{CDCl}_3$ , 500 MHz):  $\delta$  0.60 (s, 3 H), 1.11 (s, 3H), 2.88 (s, 6H), 3.87 (m, 1H), 4.15 (m, 1H), 4.47 (t,  $^3J_{\text{H,H}} = 9.0$  Hz, 1H), 6.28 (t,  $^3J_{\text{H,H}} = 7.5$  Hz, 2H), 6.43 (d,  $^3J_{\text{H,H}} = 8.0$  Hz, 2H), 6.64 (t,  $^3J_{\text{H,H}} = 7.5$  Hz, 1H), 6.90 (s, 1H), 7.16 (d,  $^3J_{\text{H,H}} = 7.5$  Hz, 1H), 7.25 (d,  $^3J_{\text{H,H}} = 8.5$  Hz, 2H), 7.34 (d,  $^3J_{\text{H,H}} = 8.5$  Hz, 2H), 7.44 (m, 2H), 7.51 (m, 1H), 7.57 (d,  $^3J_{\text{H,H}} = 8.5$  Hz, 2H), 8.25 (m, 2H), 8.47 (m, 2H);  $^{13}\text{C}$ -NMR ( $\text{CDCl}_3$ , 126 MHz):  $\delta$  16.6

(CH<sub>3</sub>), 21.8 (CH<sub>3</sub>), 40.3 (C<sub>quat.</sub>), 45.4 (CH<sub>3</sub>), 47.7 (CH), 62.1 (C<sub>quat.</sub>), 70.3 (CH<sub>2</sub>), 110.3 (C<sub>quat.</sub>), 113.2 (CH), 115.8 (CH), 118.1 (CH), 112.5 (CH), 123.1 (CH), 124.3 (CH), 127.7 (CH), 126.1 (CH), 126.5 (CH), 127.7 (CH), 128.5 (CH), 128.7 (C<sub>quat.</sub>), 128.8 (CH), 129.1 (CH), 129.6 (CH), 130.2 (CH), 131.4 (CH), 131.8 (CH), 133.0 (CH), 133.2 (C<sub>quat.</sub>), 134.7 (C<sub>quat.</sub>), 134.8 (C<sub>quat.</sub>), 139.7 (C<sub>quat.</sub>), 140.3 (C<sub>quat.</sub>), 151.6 (C<sub>quat.</sub>), 152.2 (C<sub>quat.</sub>), 174.6 (C<sub>quat.</sub>); EI MS (70 eV, *m/z* (%)): 686 ([M]<sup>+</sup>, 12), 452 ([M-Dansyl]<sup>+</sup>, 17), 307 (17), 293 (61), 170 (41), 149 (100); IR (KBr):  $\tilde{\nu}$  = 2942 cm<sup>-1</sup> (s), 2832 (s), 2788 (s), 2215 (m), 1683 (w), 1572 (s), 1462 (m), 1365 (m), 1287 (m), 1149 (w), 1058 (s), 793 (s), 758 (s), 626 (m), 584 (m); UV/VIS (CH<sub>2</sub>Cl<sub>2</sub>):  $\lambda_{\text{max}}$  ( $\epsilon$ ) 353 (18849); Combustion Analysis: Calcd. for C<sub>41</sub>H<sub>35</sub>ClN<sub>2</sub>O<sub>4</sub>S (687.3): C 71.65, H 5.13, N 4.08; Found.: C 71.53, H 4.95, N 3.83.

**4e**: M. p. 268 °C; <sup>1</sup>H-NMR (500 MHz, CDCl<sub>3</sub>):  $\delta$  0.64 (s, 3H), 1.09 (s, 3H), 2.90 (s, 6H), 3.85 (m, 1H), 4.16 (dd, <sup>3</sup>J<sub>H,H</sub> = 8.8 Hz, 1H), 4.47 (t, <sup>3</sup>J<sub>H,H</sub> = 9.3 Hz, 1H), 6.16 (d, <sup>3</sup>J<sub>H,H</sub> = 8.5 Hz, 2H), 6.32 (d, <sup>3</sup>J<sub>H,H</sub> = 8.5 Hz, 2H), 6.89 (s, 1H), 7.18 (d, <sup>3</sup>J<sub>H,H</sub> = 7.5 Hz, 1H), 7.24 (m, 2H), 7.34 (d, <sup>3</sup>J<sub>H,H</sub> = 8.5 Hz, 2H), 7.43 (m, 2H), 7.51 (m, 1H), 7.55 (d, <sup>3</sup>J<sub>H,H</sub> = 8.5 Hz, 2H), 8.15 (d, <sup>3</sup>J<sub>H,H</sub> = 8.5 Hz, 1H), 8.24 (d, <sup>3</sup>J<sub>H,H</sub> = 8.5 Hz, 1H), 8.46 (d, <sup>3</sup>J<sub>H,H</sub> = 7.5 Hz, 1H), 8.55 (d, <sup>3</sup>J<sub>H,H</sub> = 8.5 Hz, 1H); <sup>13</sup>C-NMR (128 MHz, CDCl<sub>3</sub>):  $\delta$  16.9 (CH<sub>3</sub>), 22.1 (CH<sub>3</sub>), 40.6 (C<sub>quat.</sub>), 45.6 (CH<sub>3</sub>), 47.9 (CH), 62.3 (C<sub>quat.</sub>), 70.6 (CH<sub>2</sub>), 110.3 (C<sub>quat.</sub>), 113.5 (CH), 115.3 (CH), 117.9 (CH), 122.8 (CH), 123.3 (CH), 124.6 (CH), 126.3 (CH), 127.3 (CH), 128.1 (CH), 128.7 (CH), 128.9 (CH), 129.1 (CH), 129.3 (C<sub>quat.</sub>), 129.5 (CH), 129.9 (C<sub>quat.</sub>), 130.4 (C<sub>quat.</sub>), 131.4 (C<sub>quat.</sub>), 132.4 (CH), 132.5 (C<sub>quat.</sub>), 133.3 (CH), 133.3 (C<sub>quat.</sub>), 133.6 (C<sub>quat.</sub>), 135.2 (C<sub>quat.</sub>), 139.0 (C<sub>quat.</sub>), 139.8 (C<sub>quat.</sub>), 152.4 (C<sub>quat.</sub>); EI MS: (70 eV, *m/z*, (%)): 720 ([M]<sup>+</sup>, 11), 486 ([M-Dansyl]<sup>+</sup>, 7), 460 (31), 366 (10), 277 (21), 170 (63), 154 (11), 139 (100), 111 (25), 69 (10); IR (KBr):  $\tilde{\nu}$  = 2955 (b), 2346 (w), 1757 (s), 1719 (w), 1701 (w), 1686 (w), 1676 (w), 1655 (w), 1638 (w), 1599 (w), 1561 (w), 1544 (w), 1524 (w), 1509 (w), 1490 (m), 1459 (s), 1399 (w), 1364 (m), 1262 (w), 1237 (m), 1204 (w), 1174 (m), 1148 (m), 1092 (s), 1013 (w), 968 (w), 831 (w), 790 (s), 757 (w), 689 (w), 623 (m), 578 (s); UV/VIS (CH<sub>2</sub>Cl<sub>2</sub>):  $\lambda_{\text{max}}$  ( $\epsilon$ ) 356 (15188); Combustion Analysis: Calcd. for C<sub>41</sub>H<sub>34</sub>Cl<sub>2</sub>N<sub>2</sub>O<sub>4</sub>S · 0.05 CH<sub>2</sub>Cl<sub>2</sub> (720.2+4.3): C 65.23, H 4.62, N 3.67; Found: C 65.16, H 4.75, N 3.42.

**4f**: M. p. 161 °C; <sup>1</sup>H-NMR (500 MHz, CDCl<sub>3</sub>):  $\delta$  0.52 (s, 3H) 1.02 (s, 3H), 2.81 (s, 6H), 3.43 (s, 3H), 3.78 (t, <sup>3</sup>J<sub>H,H</sub> = 11 Hz, 1H), 4.07 (m, 1H), 4.39 (m, 1H), 5.82 (d, <sup>3</sup>J<sub>H,H</sub> = 8.72 Hz, 2H), 6.32 (d, <sup>3</sup>J<sub>H,H</sub> = 8.71 Hz, 2H), 6.80 (s, 1H), 7.09 (d, <sup>3</sup>J<sub>H,H</sub> = 7.63 Hz, 1H), 7.20 (m, 1H),



7.29 (d,  $^3J_{H,H} = 8.58$  Hz, 2H), 7.46 (m, 4H), 7.50 (d,  $^3J_{H,H} = 8.60$  Hz, 2H), 8.16 (d,  $^3J_{H,H} = 8.72$  Hz, 1H), 8.20 (d,  $^3J_{H,H} = 8.19$  Hz, 1H), 8.41 (d,  $^3J_{H,H} = 7.42$  Hz, 1H), 8.46 (d,  $^3J_{H,H} = 7.56$  Hz, 1H);  $^{13}\text{C}$ -NMR (126 MHz,  $\text{CDCl}_3$ ):  $\delta$  16.6 ( $\text{CH}_3$ ), 21.9 ( $\text{CH}_3$ ), 40.3 ( $\text{C}_{\text{quat.}}$ ), 45.3 ( $\text{CH}_3$ ), 47.8 (CH), 54.9 ( $\text{CH}_3$ ), 62.2 ( $\text{C}_{\text{quat.}}$ ), 70.2 ( $\text{CH}_2$ ), 110.4 ( $\text{C}_{\text{quat.}}$ ), 113.2 (CH), 113.2 (CH), 114.9 (CH), 120.9 (CH), 123.2 (CH), 124.3 (CH), 126.2 (CH), 126.4 (CH), 126.9 (CH), 127.0 (CH), 128.4 (CH), 128.6 (CH), 128.8 (CH), 129.0 (CH), 129.1 (CH), 129.3 ( $\text{C}_{\text{quat.}}$ ), 130.3 ( $\text{C}_{\text{quat.}}$ ), 131.4 ( $\text{C}_{\text{quat.}}$ ), 131.8 (CH), 132.8 ( $\text{C}_{\text{quat.}}$ ), 133.0 (CH), 133.3 ( $\text{C}_{\text{quat.}}$ ), 134.5 ( $\text{C}_{\text{quat.}}$ ), 134.6 ( $\text{C}_{\text{quat.}}$ ), 139.6 ( $\text{C}_{\text{quat.}}$ ), 151.0 ( $\text{C}_{\text{quat.}}$ ), 158.3 ( $\text{C}_{\text{quat.}}$ ), 174.8 ( $\text{C}_{\text{quat.}}$ ); EI Ms (70 eV, m/z, (%)): 716 ( $[\text{M}]^+$ , 100), 717 ( $[\text{M}]^+$ , 47), 718 ( $[\text{M}]^+$ , 44), 482 ( $[\text{M}-\text{C}_{12}\text{H}_{12}\text{NO}_2\text{S}]^+$ , 28), 170 (19), 139 (46); IR (KBr):  $\tilde{\nu} = 3651$  (m), 2953 (m), 2835 (m), 1756 (s), 1599 (m), 1570 (m), 1502 (s), 1489 (s), 1458 (s), 1396 (m), 1364 (s), 1285 (m), 1245 (s), 1203 (m), 1173 (s), 1145 (s), 1058 (s), 991 (m), 966 (m), 943 (m), 831 (m), 800 (m), 785 (m), 759 (m), 688 (m), 623 (m), 596 (w), 579 (s), 566 (m); UV/Vis ( $\text{CH}_2\text{Cl}_2$ ):  $\lambda_{\text{max}}$  ( $\epsilon$ ) 358 (24900); HR-MS: Calcd. for  $\text{C}_{42}\text{H}_{37}\text{NaClN}_2\text{O}_5\text{S}$ : 739.200391; Found: 739.200742.

**4g**: M. p. 263 °C;  $^1\text{H}$  NMR (500 MHz,  $\text{CDCl}_3$ ):  $\delta$  0.81 (s, 3H), 1.47 (s, 3H), 2.38 (s, 3H), 4.19 (t,  $^3J_{H,H} = 11.0$  Hz, 1H), 4.56 (m, 1H), 4.75 (t,  $^3J_{H,H} = 9.5$  Hz, 1H), 6.15 (s, 1H), 6.20 (d,  $^3J_{H,H} = 8.0$  Hz, 2H), 6.47 (t,  $^3J_{H,H} = 7.5$  Hz, 2H), 6.72 (t,  $^3J_{H,H} = 7.5$  Hz, 1H), 7.14 (d,  $^3J_{H,H} = 8.5$  Hz, 2H), 7.29 (t,  $^3J_{H,H} = 7.5$  Hz, 1H), 7.37 (d,  $^3J_{H,H} = 7.5$  Hz, 1H), 7.50 (m, 5H), 7.82 (d,  $^3J_{H,H} = 8.0$  Hz, 2H), 7.99 (d,  $^3J_{H,H} = 8.5$  Hz, 1H), 8.04 (dd,  $^3J_{H,H} = 8.5$  Hz,  $^4J_{H,H} = 3.0$  Hz, 2H), 8.14 (d,  $^3J_{H,H} = 8.5$  Hz, 1H), 8.20 (d,  $^3J_{H,H} = 8.5$  Hz, 1H), 8.51 (s, 1H);  $^{13}\text{C}$  NMR (126 MHz,  $\text{CDCl}_3$ ):  $\delta$  17.5 ( $\text{CH}_3$ ), 21.9 ( $\text{CH}_3$ ), 22.2 ( $\text{CH}_3$ ), 40.8 ( $\text{C}_{\text{quat.}}$ ), 47.7 (CH), 62.8 ( $\text{C}_{\text{quat.}}$ ), 71.4 ( $\text{CH}_2$ ), 113.2 (CH), 114.7 ( $\text{C}_{\text{quat.}}$ ), 122.5 (CH), 124.5 ( $\text{C}_{\text{quat.}}$ ), 124.8 (CH), 125.5 (CH), 125.7 (CH), 125.9 (CH), 126.2 (CH), 126.3 (CH), 126.5 (CH), 126.8 (CH), 128.0 (CH), 128.2 (CH), 128.9 (CH), 129.9 (CH), 129.5 (CH), 129.8 (CH), 130.8 ( $\text{C}_{\text{quat.}}$ ), 131.0 ( $\text{C}_{\text{quat.}}$ ), 131.5 ( $\text{C}_{\text{quat.}}$ ), 131.6 ( $\text{C}_{\text{quat.}}$ ), 132.0 ( $\text{C}_{\text{quat.}}$ ), 134.0 ( $\text{C}_{\text{quat.}}$ ), 135.2 ( $\text{C}_{\text{quat.}}$ ), 139.4 ( $\text{C}_{\text{quat.}}$ ), 140.8 ( $\text{C}_{\text{quat.}}$ ), 145.4 ( $\text{C}_{\text{quat.}}$ ), 150.9 ( $\text{C}_{\text{quat.}}$ ); EI Ms: (70 eV, m/z, (%)) 673 ( $[\text{M}]^+$ , 37), 518 (21), 340 (17), 299 (12), 252 (28), 205 (64), 177 (57), 135 (56), 91 (81), 57 (67), 43 (100); IR (KBr):  $\tilde{\nu} = 3053$  (w), 2976 (w), 1760 (s), 1655 (w), 1598 (m), 1492 (w), 1459 (m), 1377 (m), 1324 (w), 1295 (w), 1238 (m), 1179 (s), 1145 (m), 1092 (w), 1059 (m), 978 (w), 888 (w), 847 (w), 814 (w), 762 (m), 691 (m), 660 (m), 593 (w), 572 (s), 545 (m); UV/Vis ( $\text{CH}_2\text{Cl}_2$ ):  $\lambda_{\text{max}}$  ( $\epsilon$ ) 387 (10500), 368 (10600), 321 nm (17200); Combustion

Analysis: Calcd. for  $C_{44}H_{35}NO_4S$  (673.8): C 78.43, H 5.24, N 2.08: Found: C 78.18, H 5.39, N 2.00.

**4h**: M. p. 189 °C;  $^1H$  NMR (500 MHz,  $CDCl_3$ ):  $\delta$  0.74 (s, 3H), 1.51 (s, 3H), 1.57 (s, 9H), 4.24 (t,  $^3J_{H,H} = 11.0$  Hz, 1H), 4.57 (m, 1H), 4.75 (t,  $^3J_{H,H} = 9.5$  Hz, 1H), 6.23 (s, 1H), 6.56 (d,  $^3J_{H,H} = 7.5$  Hz, 2H), 6.93 (m, 3H), 7.29 (t,  $^3J_{H,H} = 7.5$  Hz, 1H), 7.41 (d,  $^3J_{H,H} = 7.5$  Hz, 2H), 7.46 (m, 1H), 7.52 (m, 2H), 7.57 (t,  $^3J_{H,H} = 7.5$  Hz, 1H), 7.91 (d,  $^3J_{H,H} = 8.0$  Hz, 1H), 8.01 (d,  $^3J_{H,H} = 8.5$  Hz, 1H), 8.05 (d,  $^3J_{H,H} = 8.5$  Hz, 1H), 8.18 (d,  $^3J_{H,H} = 8.5$  Hz, 1H), 8.25 (d,  $^3J_{H,H} = 8.5$  Hz, 1H), 8.53 (s, 1H);  $^{13}C$  NMR (126 MHz,  $CDCl_3$ ):  $\delta$  17.7 ( $CH_3$ ), 22.1 ( $CH_3$ ), 28.3 ( $CH_3$ ), 40.7 ( $C_{quat.}$ ), 47.6 (CH), 62.9 ( $C_{quat.}$ ), 71.3 ( $CH_2$ ), 84.3 ( $C_{quat.}$ ), 109.6 ( $C_{quat.}$ ), 115.0 (CH), 124.6 ( $C_{quat.}$ ), 125.9 (CH), 126.2 (CH), 126.6 (CH), 126.4 (CH), 126.8 (CH), 127.0 (CH), 128.3 (CH), 128.9 (CH), 129.3 (CH), 130.9 ( $C_{quat.}$ ), 131.6 ( $C_{quat.}$ ), 134.0 ( $C_{quat.}$ ), 136.9 ( $C_{quat.}$ ), 140.0 ( $C_{quat.}$ ), 141.2 ( $C_{quat.}$ ), 149.4 ( $C_{quat.}$ ), 150.5 ( $C_{quat.}$ ), 175.0 ( $C_{quat.}$ ); EI Ms: (70 eV, m/z, (%)) 619 ( $[M]^+$ , 17), 519 ( $[M-Boc]^+$ , 100), 450 (12), 299 (51), 287 (14), 255 (14), 215 (17), 205 (35), 191 (16), 177 (65), 150 (16), 56 (54), 44 (20), 41 (50); IR (KBr):  $\tilde{\nu} = 2979$  (w), 1767 (m), 1724 (m), 1655 (w), 1602 (w), 1476 (m), 1463 (m), 1395 (w), 1370 (w), 1346 (m), 1303 (m), 1289 (m), 1252 (m), 1148 (s), 1098 (m), 1060 (w), 1003 (w), 936 (w), 891 (w), 844 (w), 750 (m), 735 (m), 699 (m), 645 (m); UV/Vis ( $CH_2Cl_2$ ):  $\lambda_{max.}$  ( $\epsilon$ ) 387 (10600), 367 (10100), 320 nm (19300); Combustion Analysis: Calcd. for  $C_{42}H_{37}NO_4 \cdot 0.02 CH_2Cl_2$  (619.8+1.7): C 80.26, H 5.96, N 2.22: Found: C 80.03, H 5.93, N 2.20.

**4i**: M. p. 263 °C;  $^1H$  NMR (500 MHz,  $CDCl_3$ ):  $\delta$  0.72 (s, 3H), 1.36 (s, 3H), 2.86 (s, 6H), 4.18 (t,  $^3J_{H,H} = 11.0$  Hz, 1H), 4.52 (dd,  $^3J_{H,H} = 9.0$  Hz,  $^3J_{H,H} = 12.0$  Hz, 1H), 4.72 (t,  $^3J_{H,H} = 9.5$  Hz, 1H), 6.09 (t,  $^3J_{H,H} = 8.0$  Hz, 2H), 6.13 (s, 1H), 6.22 (d,  $^3J_{H,H} = 7.5$  Hz, 2H), 6.48 (t,  $^3J_{H,H} = 7.5$  Hz, 1H), 7.14 (d,  $^3J_{H,H} = 7.5$  Hz, 1H), 7.46 (m, 9H), 8.00 (m, 3H), 8.10 (d,  $^3J_{H,H} = 8.5$  Hz, 1H), 8.21 (d,  $^3J_{H,H} = 8.5$  Hz, 1H), 8.25 (d,  $^3J_{H,H} = 9.0$  Hz, 1H), 8.29 (d,  $^3J_{H,H} = 8.0$  Hz, 1H), 8.46 (m, 1H), 8.50 (s, 1H);  $^{13}C$  NMR (126 MHz,  $CDCl_3$ ):  $\delta$  17.3 ( $CH_3$ ), 22.1 ( $CH_3$ ), 41.2 ( $C_{quat.}$ ), 45.7 ( $CH_3$ ), 47.6 (CH), 62.6 ( $C_{quat.}$ ), 71.4 ( $CH_2$ ), 113.5 (CH), 114.8 ( $C_{quat.}$ ), 115.3 (CH), 122.2 (CH), 123.4 (CH), 124.4 ( $C_{quat.}$ ), 124.6 (CH), 125.5 (CH), 125.7 (CH), 125.8 (CH), 125.9 (CH), 126.1 (CH), 126.4 (CH), 126.7 (CH), 126.8 (CH), 127.7 (CH), 128.8 (CH), 128.9 (CH), 129.3 (CH), 129.4 (CH), 130.4 ( $C_{quat.}$ ), 130.8 ( $C_{quat.}$ ), 130.9 ( $C_{quat.}$ ), 131.5 ( $C_{quat.}$ ), 131.5 ( $C_{quat.}$ ), 131.9 ( $C_{quat.}$ ), 132.0 (CH), 133.3 (CH), 133.4 ( $C_{quat.}$ ),

133.8 (C<sub>quat.</sub>), 140.0 (C<sub>quat.</sub>), 140.1 (C<sub>quat.</sub>), 150.9 (C<sub>quat.</sub>), 175.1 (C<sub>quat.</sub>); EI Ms (70 eV, m/z, (%)): 752 ([M]<sup>+</sup>, 100), 590 (10), 519 (32), 518 ([M-Ds]<sup>+</sup>, 46), 205 (34), 177 (16), 171 (13), 170 (27), 86 (23), 84 (39), 49 (27), 44 (24), 43 (48); IR (KBr):  $\tilde{\nu}$  = 3855 (w), 3752 (w), 3651 (w), 3424 (s), 2942 (m), 1753 (s), 1718 (w), 1701 (w), 1655 (m), 1638 (m), 1598 (m), 1543 (w), 1508 (w), 1491 (w), 1458 (s), 1360 (s), 1323 (m), 1237 (s), 1203 (m), 1174 (s), 1145 (s), 1059 (s), 966 (m), 885 (w), 842 (w), 784 (m), 760 (s), 688 (m), 625 (s), 575 (s); UV/Vis (CH<sub>2</sub>Cl<sub>2</sub>):  $\lambda_{\text{max}}$ . ( $\epsilon$ ) 326 nm (10800), 366 nm (7800), 385 nm (6800); Combustion Analysis: Calcd. for C<sub>49</sub>H<sub>40</sub>N<sub>2</sub>O<sub>4</sub>S (752.9): C 78.17, H 5.35, N 3.72 Found: C 78.05, H 5.16, N 3.82.

**4j**: M. p. 265 °C; <sup>1</sup>H NMR (500 MHz, CDCl<sub>3</sub>):  $\delta$  0.76 (s, 3H), 1.39 (s, 3H), 2.87 (d, <sup>3</sup>J<sub>H,H</sub> = 9.0 Hz, 6H), 4.17 (t, <sup>3</sup>J<sub>H,H</sub> = 11.0 Hz, 1H), 4.53 (dd, <sup>3</sup>J<sub>H,H</sub> = 9.5 Hz, <sup>3</sup>J<sub>H,H</sub> = 12.0 Hz, 1H), 4.74 (t, <sup>3</sup>J<sub>H,H</sub> = 9.5 Hz, 1H), 5.97 (m, 2H), 6.12 (d, <sup>3</sup>J<sub>H,H</sub> = 8.5 Hz, 3H), 7.16 (d, <sup>3</sup>J<sub>H,H</sub> = 7.5 Hz, 1H), 7.45 (m, 8H), 8.01 (m, 2H), 8.09 (d, <sup>3</sup>J<sub>H,H</sub> = 8.0 Hz, 1H), 8.19 (dd, <sup>3</sup>J<sub>H,H</sub> = 5.5 Hz, <sup>3</sup>J<sub>H,H</sub> = 8.5 Hz, 2H), 8.27 (d, <sup>3</sup>J<sub>H,H</sub> = 8.0 Hz, 1H), 8.48 (d, <sup>3</sup>J<sub>H,H</sub> = 7.5 Hz, 1H), 8.51 (s, 1H), 8.54 (d, <sup>3</sup>J<sub>H,H</sub> = 8.5 Hz, 1H); <sup>13</sup>C NMR (126 MHz, CDCl<sub>3</sub>):  $\delta$  17.3 (CH<sub>3</sub>), 22.1 (CH<sub>3</sub>), 41.2 (C<sub>quat.</sub>), 45.6 (CH<sub>3</sub>), 47.5 (CH), 62.5 (C<sub>quat.</sub>), 71.5 (CH<sub>2</sub>), 113.5 (CH), 114.7 (C<sub>quat.</sub>), 115.4 (CH), 122.7 (CH), 123.3 (CH), 124.3 (C<sub>quat.</sub>), 124.7 (CH), 125.6 (CH), 125.7 (CH), 125.9 (CH), 126.0 (CH), 126.3 (CH), 126.8 (CH), 126.8 (CH), 127.1 (CH), 127.8 (CH), 128.9 (CH), 128.9 (CH), 129.4 (CH), 129.6 (CH), 130.4 (C<sub>quat.</sub>), 130.8 (C<sub>quat.</sub>), 130.9 (C<sub>quat.</sub>), 131.5 (C<sub>quat.</sub>), 131.5 (C<sub>quat.</sub>), 131.6 (C<sub>quat.</sub>), 132.2 (C<sub>quat.</sub>), 132.4 (CH), 132.4 (C<sub>quat.</sub>), 133.3 (CH), 138.6 (C<sub>quat.</sub>), 139.9 (C<sub>quat.</sub>), 151.4 (C<sub>quat.</sub>), 175.0 (C<sub>quat.</sub>); EI Ms (70 eV, m/z, (%)): 786 ([M]<sup>+</sup>, 100), 554 (13), 553 (14), 552 ([M-Dansyl]<sup>+</sup>, 35), 392 (14), 205 (31), 177 (15), 170 ([M-C<sub>37</sub>H<sub>27</sub>ClNO<sub>4</sub>S]<sup>+</sup>, 24), 57 (15), 56 (14), 44 ([N-(CH<sub>3</sub>)<sub>2</sub>]<sup>+</sup>, 11), 43 (76), 42 (16), 41 (21); IR (KBr):  $\tilde{\nu}$  = 3855 (w), 3752 (w), 3736 (w), 3713 (w), 3677 (w), 3650 (w), 2938 (m), 1757 (s), 1655 (m), 1543 (m), 1508 (m), 1458 (s), 1364 (s), 1323 (m), 1238 (m), 1174 (s), 1146 (s), 1058 (s), 967 (m), 890 (m), 788 (s), 757 (m), 734 (m), 687 (m), 622 (s), 576 (s); UV/Vis (CH<sub>2</sub>Cl<sub>2</sub>):  $\lambda_{\text{max}}$ . ( $\epsilon$ ) 330 nm (22100), 367 nm (16700), 386 nm (14800); Combustion Analysis: Calcd. for C<sub>49</sub>H<sub>39</sub>ClN<sub>2</sub>O<sub>4</sub>S (787.4): C 74.75, H 4.99, N 3.56: Found: C 74.59, H 5.01, N 3.44.

**4k**: M. p. 276 °C; <sup>1</sup>H NMR (500 MHz, CDCl<sub>3</sub>):  $\delta$  0.70 (s, 3H), 1.37 (s, 3H), 2.85 (s, 6H), 3.37 (s, 3H), 4.17 (m, 1H), 4.50 (dd, <sup>3</sup>J<sub>H,H</sub> = 9.0 Hz, <sup>3</sup>J<sub>H,H</sub> = 12.0 Hz, 1H), 4.71 (t, <sup>3</sup>J<sub>H,H</sub> = 9.5 Hz, 1H), 5.67 (d, <sup>3</sup>J<sub>H,H</sub> = 9.0 Hz, 2H), 6.08 (s, 1H), 6.18 (d, <sup>3</sup>J<sub>H,H</sub> = 9.0 Hz, 2H), 7.13 (d,

$^3J_{H,H} = 7.5$  Hz, 1H), 7.34 (t,  $^3J_{H,H} = 7.5$  Hz, 1H), 7.47 (m, 8H), 8.00 (m, 2H), 8.11 (d,  $^3J_{H,H} = 8.0$  Hz, 1H), 8.22 (m, 2H), 8.28 (d,  $^3J_{H,H} = 8.0$  Hz, 1H), 8.48 (m, 3H);  $^{13}\text{C}$  NMR (126 MHz,  $\text{CDCl}_3$ ):  $\delta$  17.3 ( $\text{CH}_3$ ), 22.1 ( $\text{CH}_3$ ), 41.2 ( $\text{C}_{\text{quat.}}$ ), 45.5 ( $\text{CH}_3$ ), 47.7 (CH), 55.0 ( $\text{CH}_3$ ), 62.6 ( $\text{C}_{\text{quat.}}$ ), 71.3 ( $\text{CH}_2$ ), 113.2 (CH), 113.4 (CH), 114.9 ( $\text{C}_{\text{quat.}}$ ), 115.1 (CH), 118.3 (CH), 121.0 (CH), 123.4 (CH), 124.6 ( $\text{C}_{\text{quat.}}$ ), 124.6 (CH), 125.5 (CH), 125.7 (CH), 126.0 (CH), 126.2 (CH), 126.5 (CH), 126.7 (CH), 126.7 (CH), 127.0 (CH), 128.8 (CH), 129.0 ( $\text{C}_{\text{quat.}}$ ), 129.2 (CH), 129.4 (CH), 129.7 ( $\text{C}_{\text{quat.}}$ ), 130.5 ( $\text{C}_{\text{quat.}}$ ), 130.8 ( $\text{C}_{\text{quat.}}$ ), 130.9 ( $\text{C}_{\text{quat.}}$ ), 131.5 ( $\text{C}_{\text{quat.}}$ ), 131.5 ( $\text{C}_{\text{quat.}}$ ), 131.9 ( $\text{C}_{\text{quat.}}$ ), 132.1 (CH), 132.7 ( $\text{C}_{\text{quat.}}$ ), 133.2 (CH), 133.5 ( $\text{C}_{\text{quat.}}$ ), 133.5 ( $\text{C}_{\text{quat.}}$ ), 139.9 ( $\text{C}_{\text{quat.}}$ ), 150.2 ( $\text{C}_{\text{quat.}}$ ), 158.3 ( $\text{C}_{\text{quat.}}$ ), 175.2 ( $\text{C}_{\text{quat.}}$ ); EI Ms (70 eV, m/z, (%)): 782 ( $[\text{M}]^+$ , 100), 552 (13), 549 (20), 548 ( $[\text{M}-\text{Ds}]^+$ , 28), 250 (31), 205 (54), 177 (25), 171 (16), 170 ( $[\text{C}_{12}\text{H}_{12}\text{N}]^+$ , 44), 169 (11), 168 (13), 149 (12); IR (KBr):  $\tilde{\nu} = 3855$  (w), 3752 (w), 2936 (m), 2833 (m), 1757 (s), 1655 (m), 1606 (m), 1509 (s), 1458 (s), 1409 (m), 1362 (s), 1322 (m), 1306 (m), 1240 (s), 1203 (m), 1175 (s), 1145 (s), 1057 (m), 966 (m), 944 (m), 885 (w), 829 (m), 785 (s), 756 (m), 733 (m), 687 (m); UV/Vis ( $\text{CH}_2\text{Cl}_2$ ):  $\lambda_{\text{max.}}$  ( $\epsilon$ ) 327 nm (22900), 366 nm (15700), 384 nm (13800); Combustion Analysis: Calcd. for  $\text{C}_{50}\text{H}_{42}\text{N}_2\text{O}_5\text{S}$  (782.9): C 76.70, H 5.41, N 3.58. Found: C 76.48, H 5.17, N 3.43.

### General Procedure for the Synthesis of *N*-unsubstituted Spirocyclic Chromophores and Bichromophores:

In an argon flushed oven-dried screw-cap vessel, compound **4a** or **4h** (0.2 mmol), respectively, was dissolved in dry dichloromethane (5 mL) and 2 equivalents of dry zinc bromide were added. Then the reaction mixture was stirred for 2 h at room temperature before the solvent was removed in vacuo and the residue was chromatographed on silica gel (*n*-hexane/ethyl acetate + 5 vol% of triethylamine). After recrystallization from dichloromethane/*n*-hexane the spirocyclic chromophores were obtained as pale yellow powders.

**4l**: M. p. 270 °C;  $^1\text{H}$  NMR (500 MHz,  $\text{CDCl}_3$ ):  $\delta$  0.66 (s, 3H), 1.24 (s, 3H), 3.97 (dd,  $^3J_{H,H} = 12.5$  Hz,  $^3J_{H,H} = 9.5$  Hz, 1H), 4.23 (dd,  $^3J_{H,H} = 13.5$  Hz,  $^3J_{H,H} = 8.5$  Hz, 1H), 4.52 (m, 1H), 6.76 (d,  $^3J_{H,H} = 7.5$  Hz, 2H), 6.83 (m, 2H), 7.04 (s, 1H), 7.07 (m, 3H), 7.26 (m, 2H), 7.35 (d,  $^3J_{H,H} = 7.5$  Hz, 1H), 7.40 (m, 2H), 7.69 (d,  $^3J_{H,H} = 8.0$  Hz, 2H), 8.33 (s, 1H);  $^{13}\text{C}$  NMR (126 MHz,  $\text{CDCl}_3$ ):  $\delta$  15.7 ( $\text{CH}_3$ ), 20.9 ( $\text{CH}_3$ ), 40.0 ( $\text{C}_{\text{quat.}}$ ), 47.3 (CH), 61.8 ( $\text{C}_{\text{quat.}}$ ), 69.2 ( $\text{CH}_2$ ), 108.6 ( $\text{C}_{\text{quat.}}$ ), 109.3 (CH), 121.3 (CH), 121.4 (CH), 125.1 (CH), 124.4 (CH), 126.0 (CH),

126.3 (CH), 127.2 (CH), 127.3 (CH), 127.5 (CH), 127.9 (CH), 130.0 (C<sub>quat.</sub>), 132.4 (C<sub>quat.</sub>), 134.3 (C<sub>quat.</sub>), 139.8 (C<sub>quat.</sub>), 140.9 (C<sub>quat.</sub>), 151.2 (C<sub>quat.</sub>), 178.8 (C<sub>quat.</sub>); EI Ms (70 eV, m/z, (%)): 419 ([M]<sup>+</sup>, 69), 314 (28), 246 (14), 185 (10), 165 (15), 132 (12), 115 (13), 105 (100), 91 (11), 77 (53); IR (KBr):  $\tilde{\nu}$  = 3056 (w), 2963 (bw), 2892 (w), 1718 (s), 1618 (m), 1597 (w), 1491 (w), 1472 (m), 1445 (w), 1392 (w), 1370 (w), 1326 (w), 1260 (w), 1236 (w), 1179 (w), 1093 (m), 1067 (m), 1024 (w), 954 (w), 802 (w), 766 (m), 698 (m), 674 (w), 630 (w), 559 (w); UV/Vis (CH<sub>2</sub>Cl<sub>2</sub>):  $\lambda_{\text{max}}$ . ( $\epsilon$ ) 347 nm (19100); Combustion Analysis: Calcd. for C<sub>29</sub>H<sub>25</sub>NO<sub>2</sub> · 0.05 C<sub>4</sub>H<sub>8</sub>O<sub>2</sub> (419.5+4.4): C 81.61, H 6.16, N 3.17; Found: C 81.38, H 6.18, N 3.14.

**4m**: M. P.: 236 °C; <sup>1</sup>H NMR (500 MHz, CDCl<sub>3</sub>):  $\delta$  0.80 (s, 3H), 1.58 (s, 3H), 4.30 (t, <sup>3</sup>J<sub>H,H</sub> = 11.0 Hz, 1H), 4.61 (dd, <sup>3</sup>J<sub>H,H</sub> = 9.0 Hz, <sup>3</sup>J<sub>H,H</sub> = 11.0 Hz, 1H), 4.79 (t, <sup>3</sup>J<sub>H,H</sub> = 9.0 Hz, 1H), 6.23 (s, 1H), 6.64 (d, <sup>3</sup>J<sub>H,H</sub> = 7.0 Hz, 2H), 6.81 (d, <sup>3</sup>J<sub>H,H</sub> = 7.5 Hz, 1H), 6.94 (m, 3H), 7.17 (t, <sup>3</sup>J<sub>H,H</sub> = 7.5 Hz, 1H), 7.31 (t, <sup>3</sup>J<sub>H,H</sub> = 7.0 Hz, 1H), 7.41 (d, <sup>3</sup>J<sub>H,H</sub> = 7.5 Hz, 1H), 7.48 (m, 1H), 7.48 (m, 1H), 7.54 (m, 2H), 7.59 (m, 1H), 8.03 (d, <sup>3</sup>J<sub>H,H</sub> = 8.5 Hz, 1H), 8.07 (d, <sup>3</sup>J<sub>H,H</sub> = 8.0 Hz, 1H), 8.23 (d, <sup>3</sup>J<sub>H,H</sub> = 8.5 Hz, 1H), 8.28 (d, <sup>3</sup>J<sub>H,H</sub> = 9.0 Hz, 1H), 8.55 (s, 1H); <sup>13</sup>C NMR (126 MHz, CDCl<sub>3</sub>):  $\delta$  17.6 (CH<sub>3</sub>), 22.4 (CH<sub>3</sub>), 40.0 (C<sub>quat.</sub>), 48.4 (CH), 63.4 (C<sub>quat.</sub>), 71.6 (CH<sub>2</sub>), 110.1 (CH), 115.5 (C<sub>quat.</sub>), 122.2 (CH), 122.7 (CH), 125.8 (CH), 125.9 (CH), 126.3 (CH), 126.5 (CH), 126.5 (CH), 126.6 (CH), 126.9 (CH), 127.3 (CH), 127.7 (CH), 128.4 (CH), 128.9 (CH), 129.0 (CH), 129.1 (CH), 129.4 (CH), 131.1 (C<sub>quat.</sub>), 131.2 (C<sub>quat.</sub>), 131.7 (C<sub>quat.</sub>), 131.8 (C<sub>quat.</sub>), 133.9 (C<sub>quat.</sub>), 134.0 (C<sub>quat.</sub>), 134.9 (CH), 135.2 (C<sub>quat.</sub>), 141.3 (C<sub>quat.</sub>), 141.8 (C<sub>quat.</sub>), 150.4 (C<sub>quat.</sub>), 180.2 (C<sub>quat.</sub>); EI Ms (70 eV, m/z, (%)): 519 ([M]<sup>+</sup>, 100), 299 (62), 205 (27), 191 (11), 177 (42), 151 (12), 86 (25), 84 (31), 74 (39), 69 (22), 56 (66), 45 (30); IR (KBr):  $\tilde{\nu}$  = 2951 (w), 1705 (s), 1655 (m), 1616 (m), 1508 (w), 1491 (w), 1468 (m), 1389 (w), 1318 (w), 1178 (m), 1136 (w), 1037 (w), 976 (w), 845 (w), 749 (m), 698 (m), 635 (w), 548 (w); UV/Vis (CH<sub>2</sub>Cl<sub>2</sub>):  $\lambda_{\text{max}}$ . ( $\epsilon$ ) 386 (9200), 367 (9500), 318 (18500); Combustion Analysis: Calcd. for C<sub>37</sub>H<sub>29</sub>NO<sub>2</sub> · 0.05 CH<sub>2</sub>Cl<sub>2</sub> (519.6+4.3): C 81.83, H 5.46, N 2.56; Found: C 81.69, H 5.60, N 2.32.

### NMR-Spectra of **4a**:

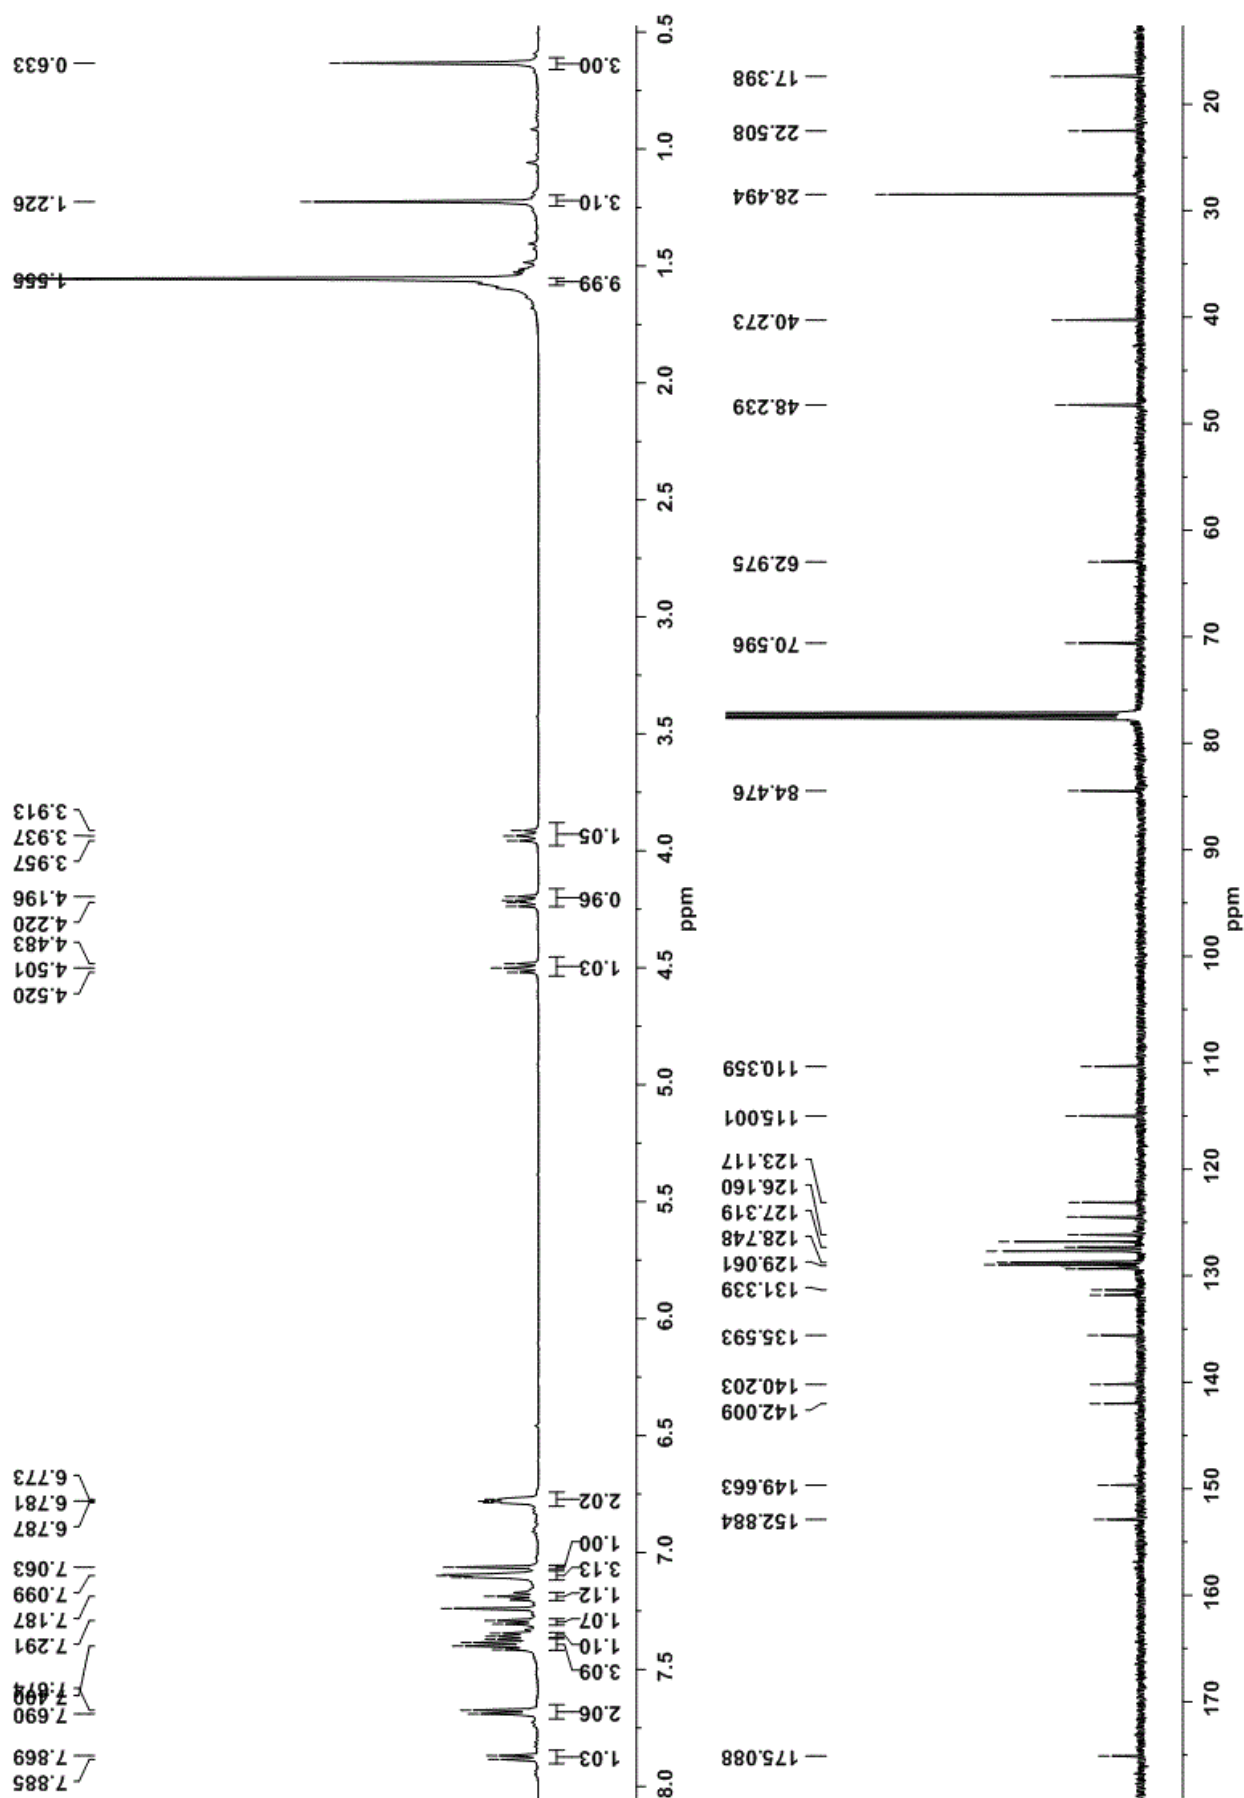

### NMR-Spectra of **4b**:

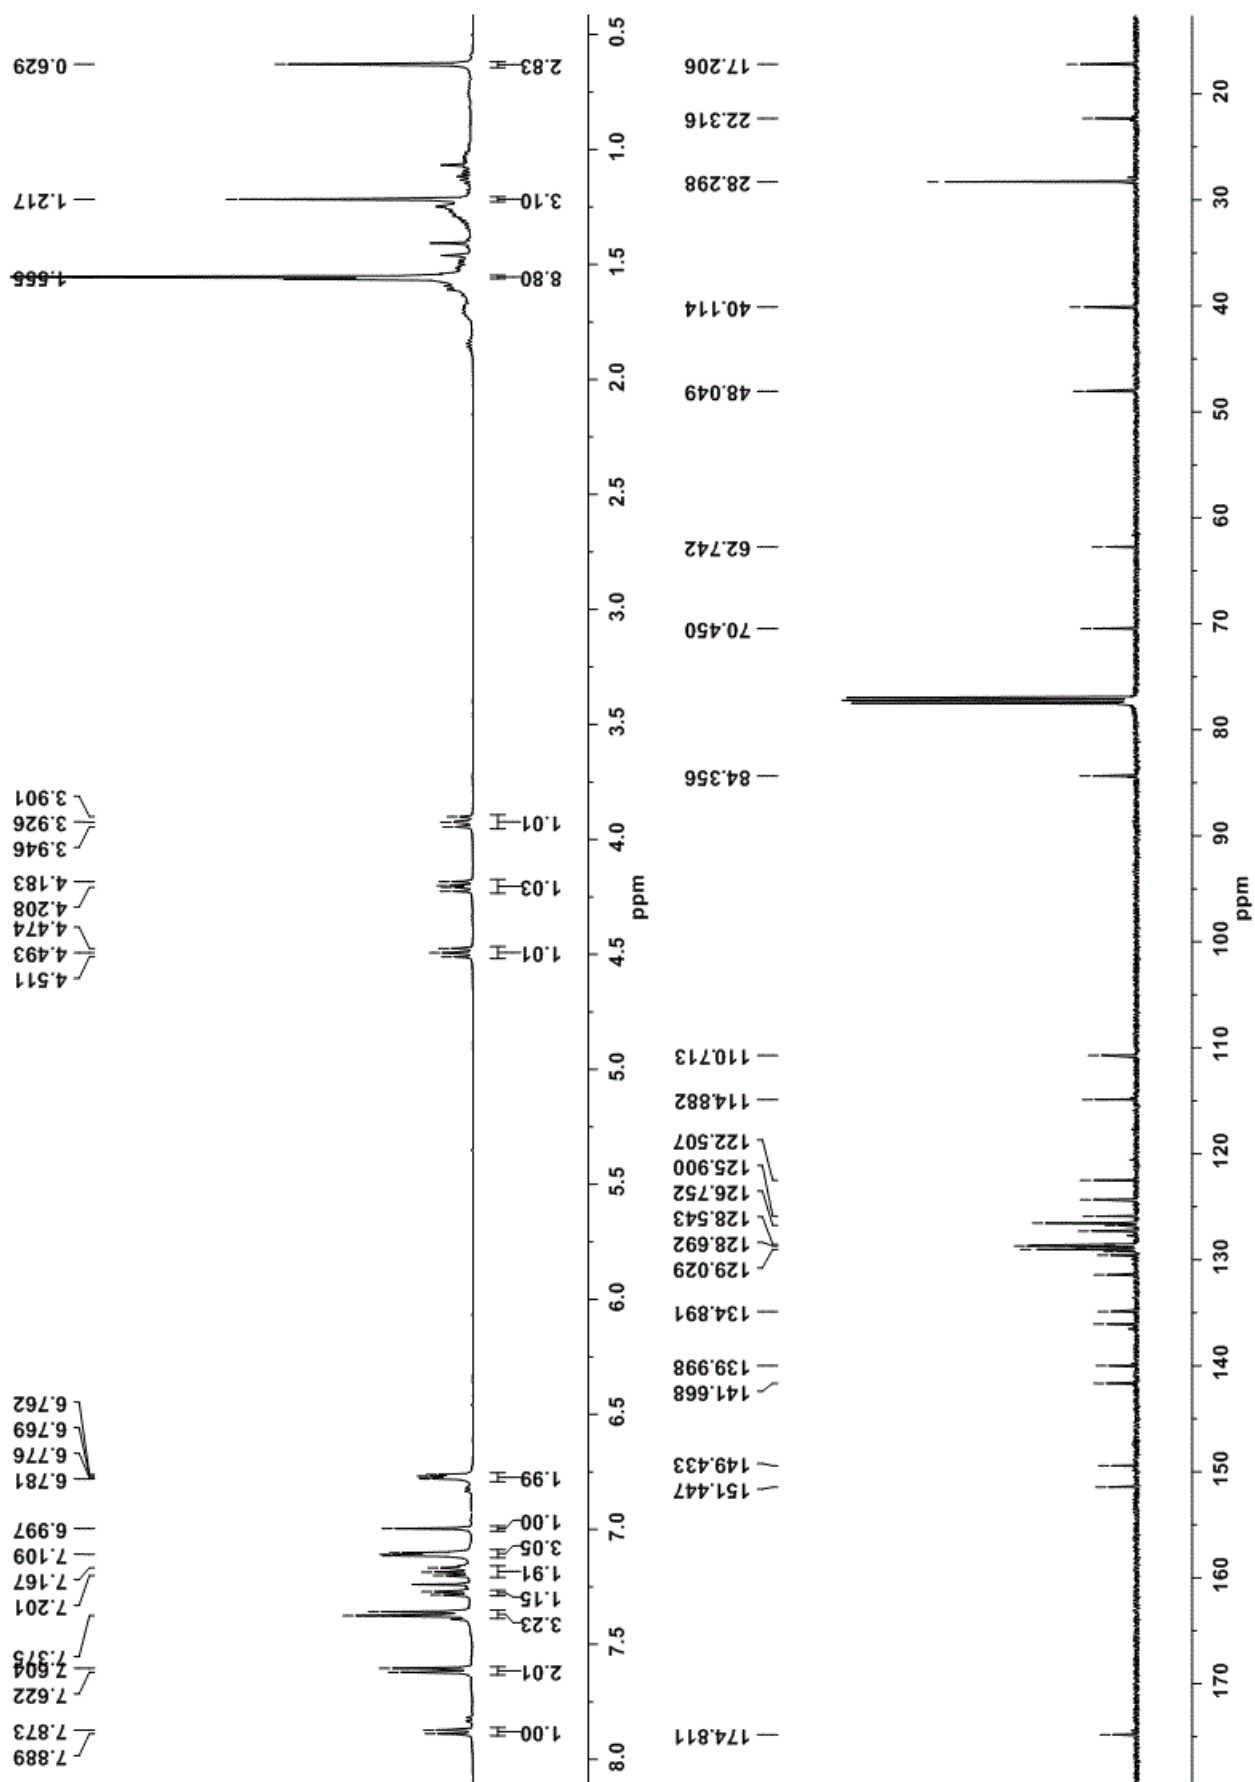

### NMR-Spectra of 4c:

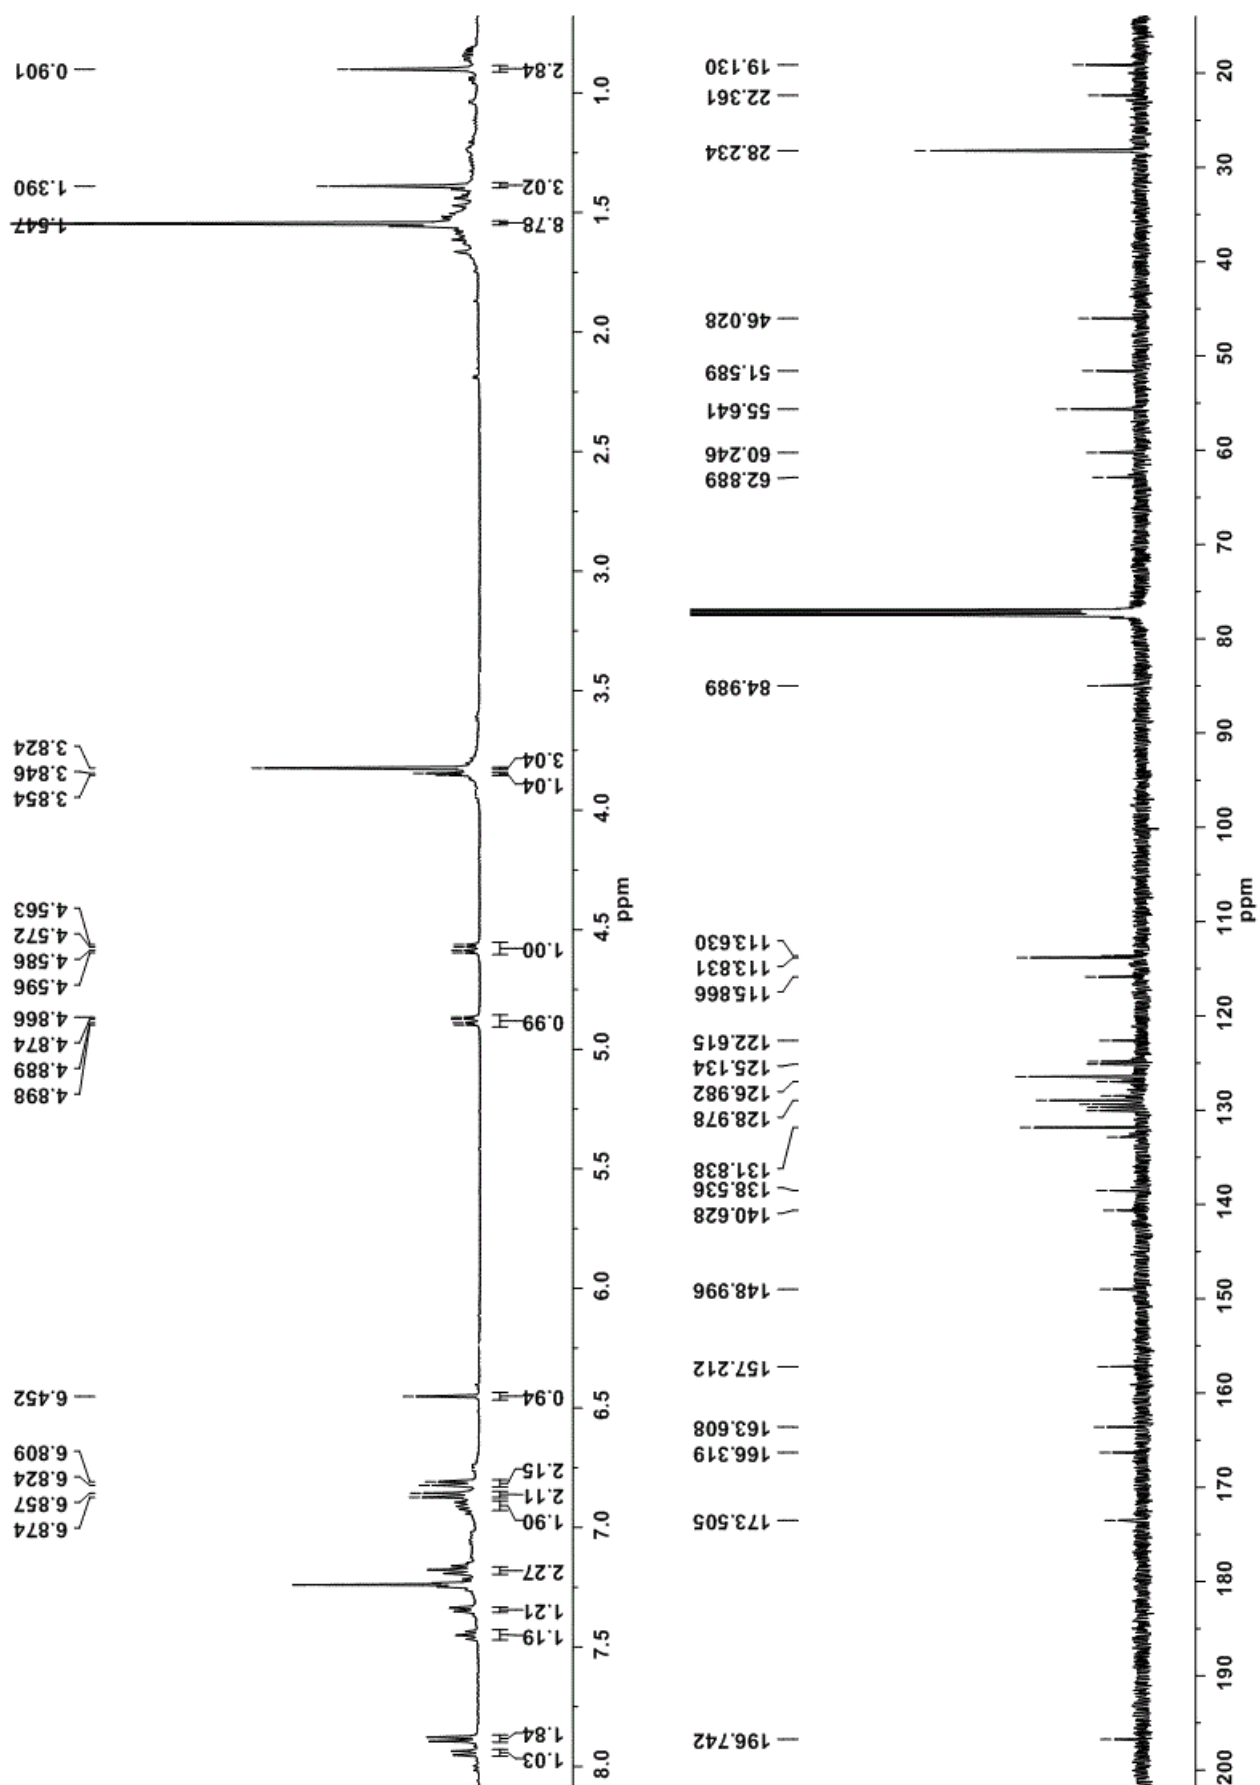



### NMR-Spectra of 4d:

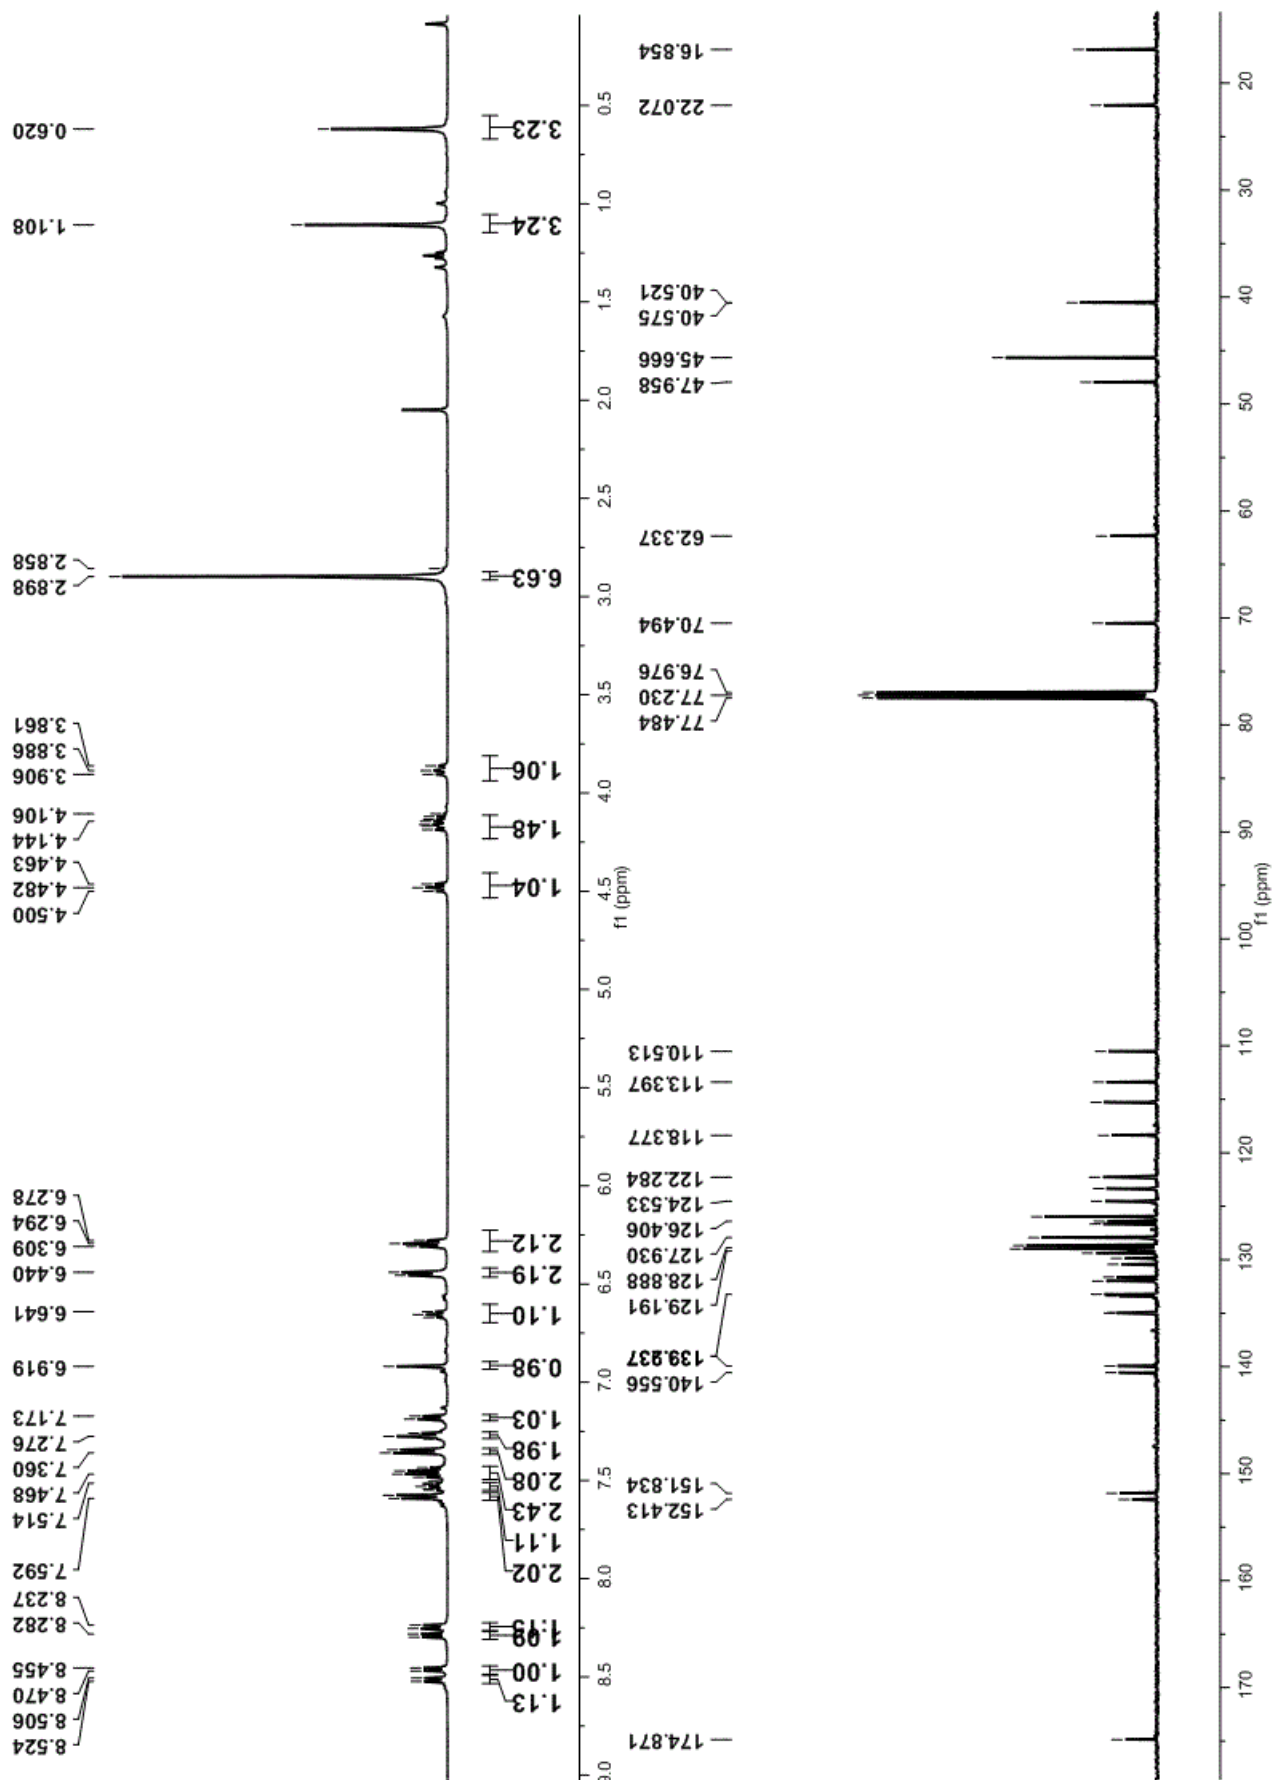

### NMR-Spectra of 4e:

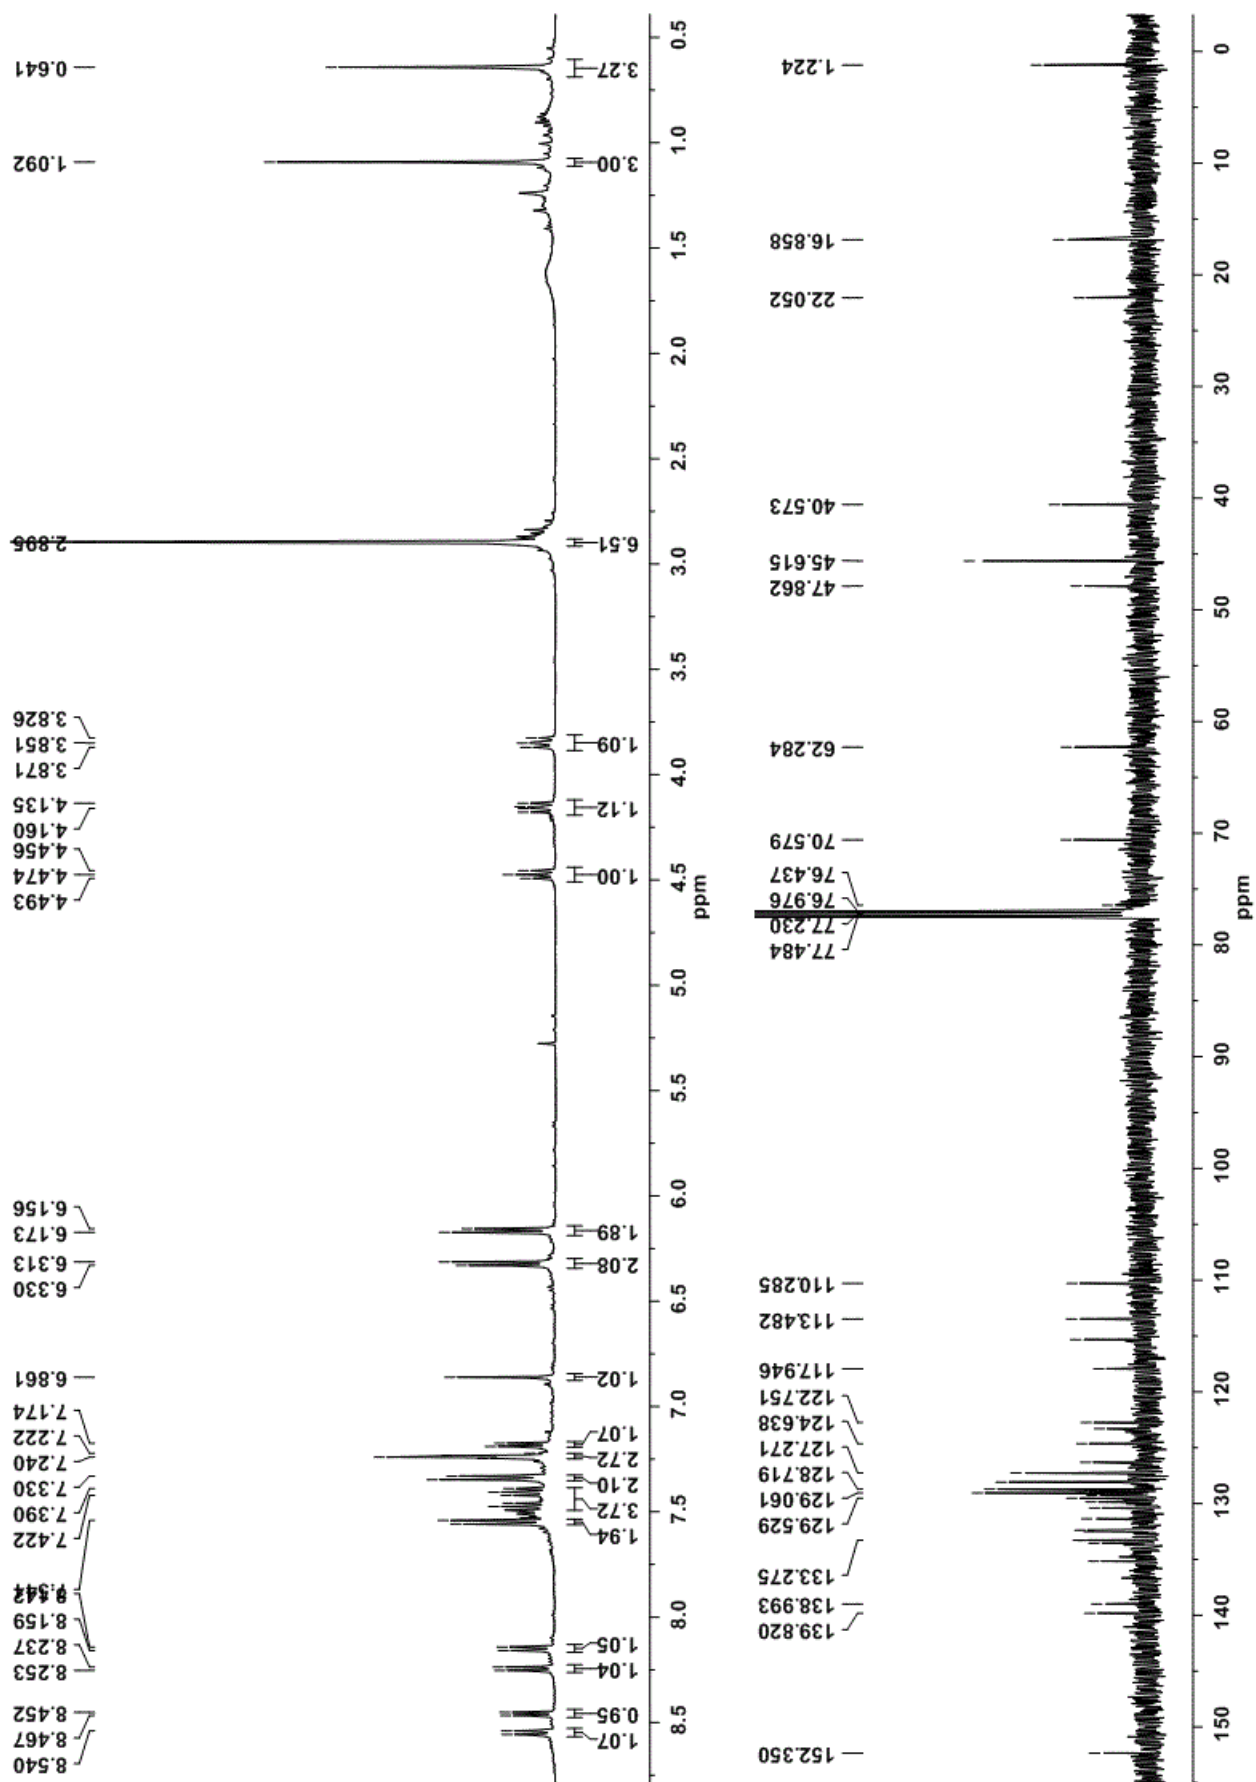

### NMR-Spectra of 4f:

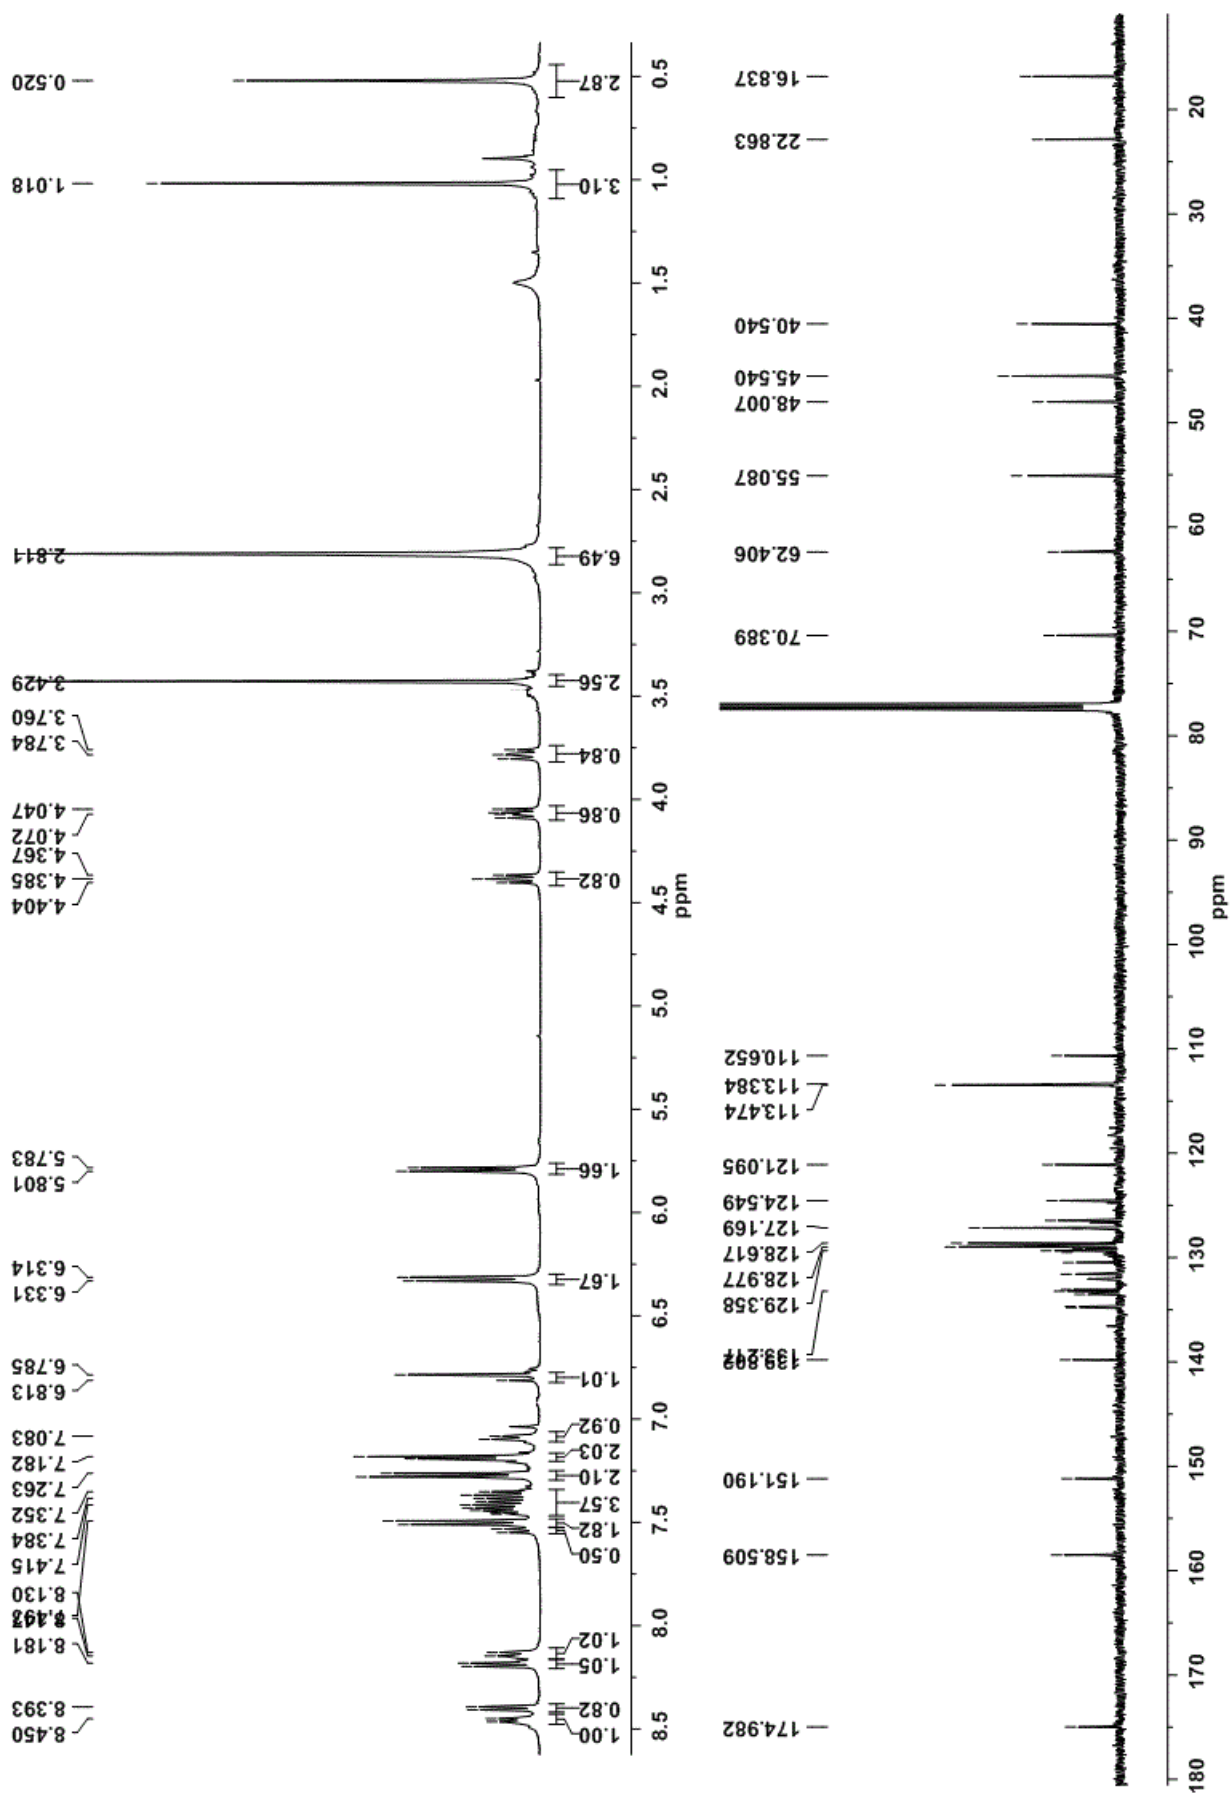

### NMR-Spectra of 4g:

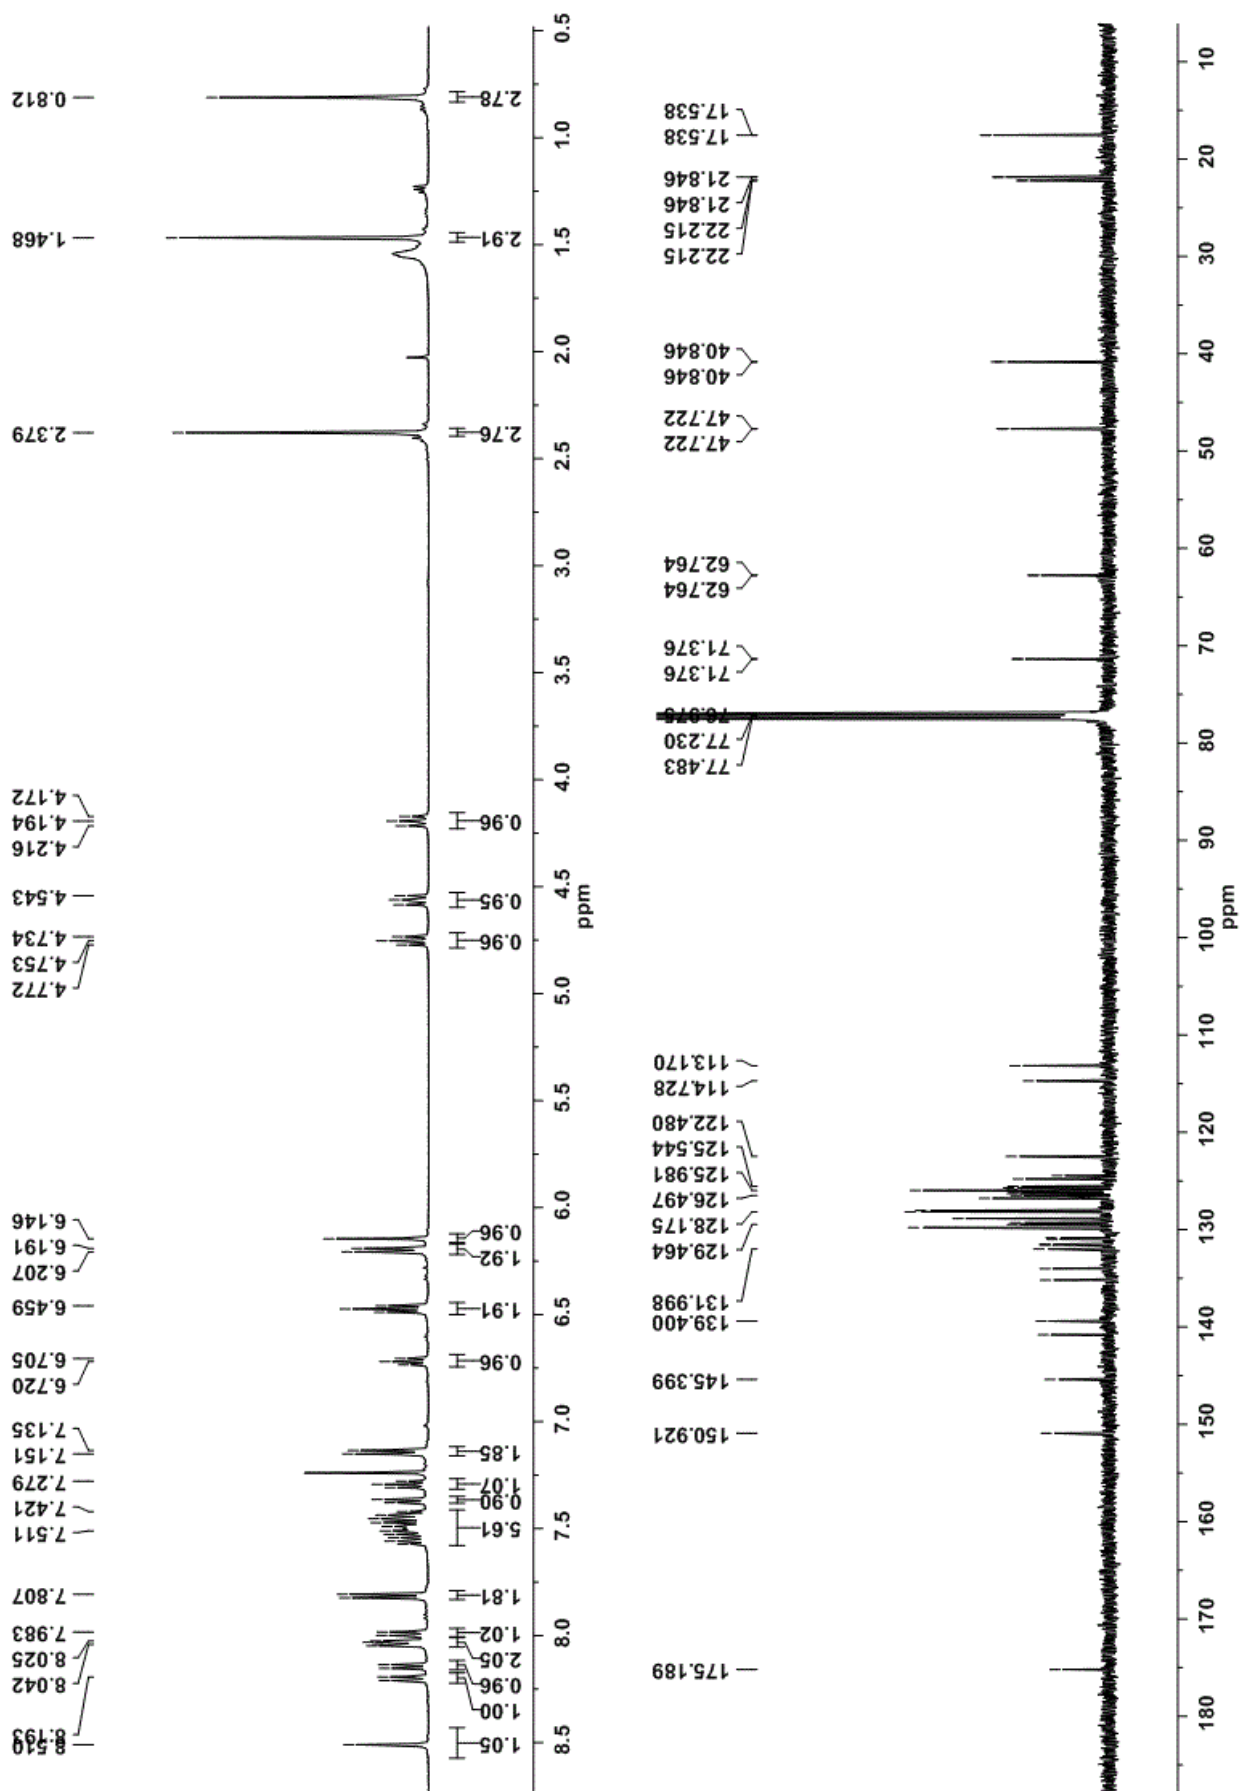

### NMR-Spectra of 4h:

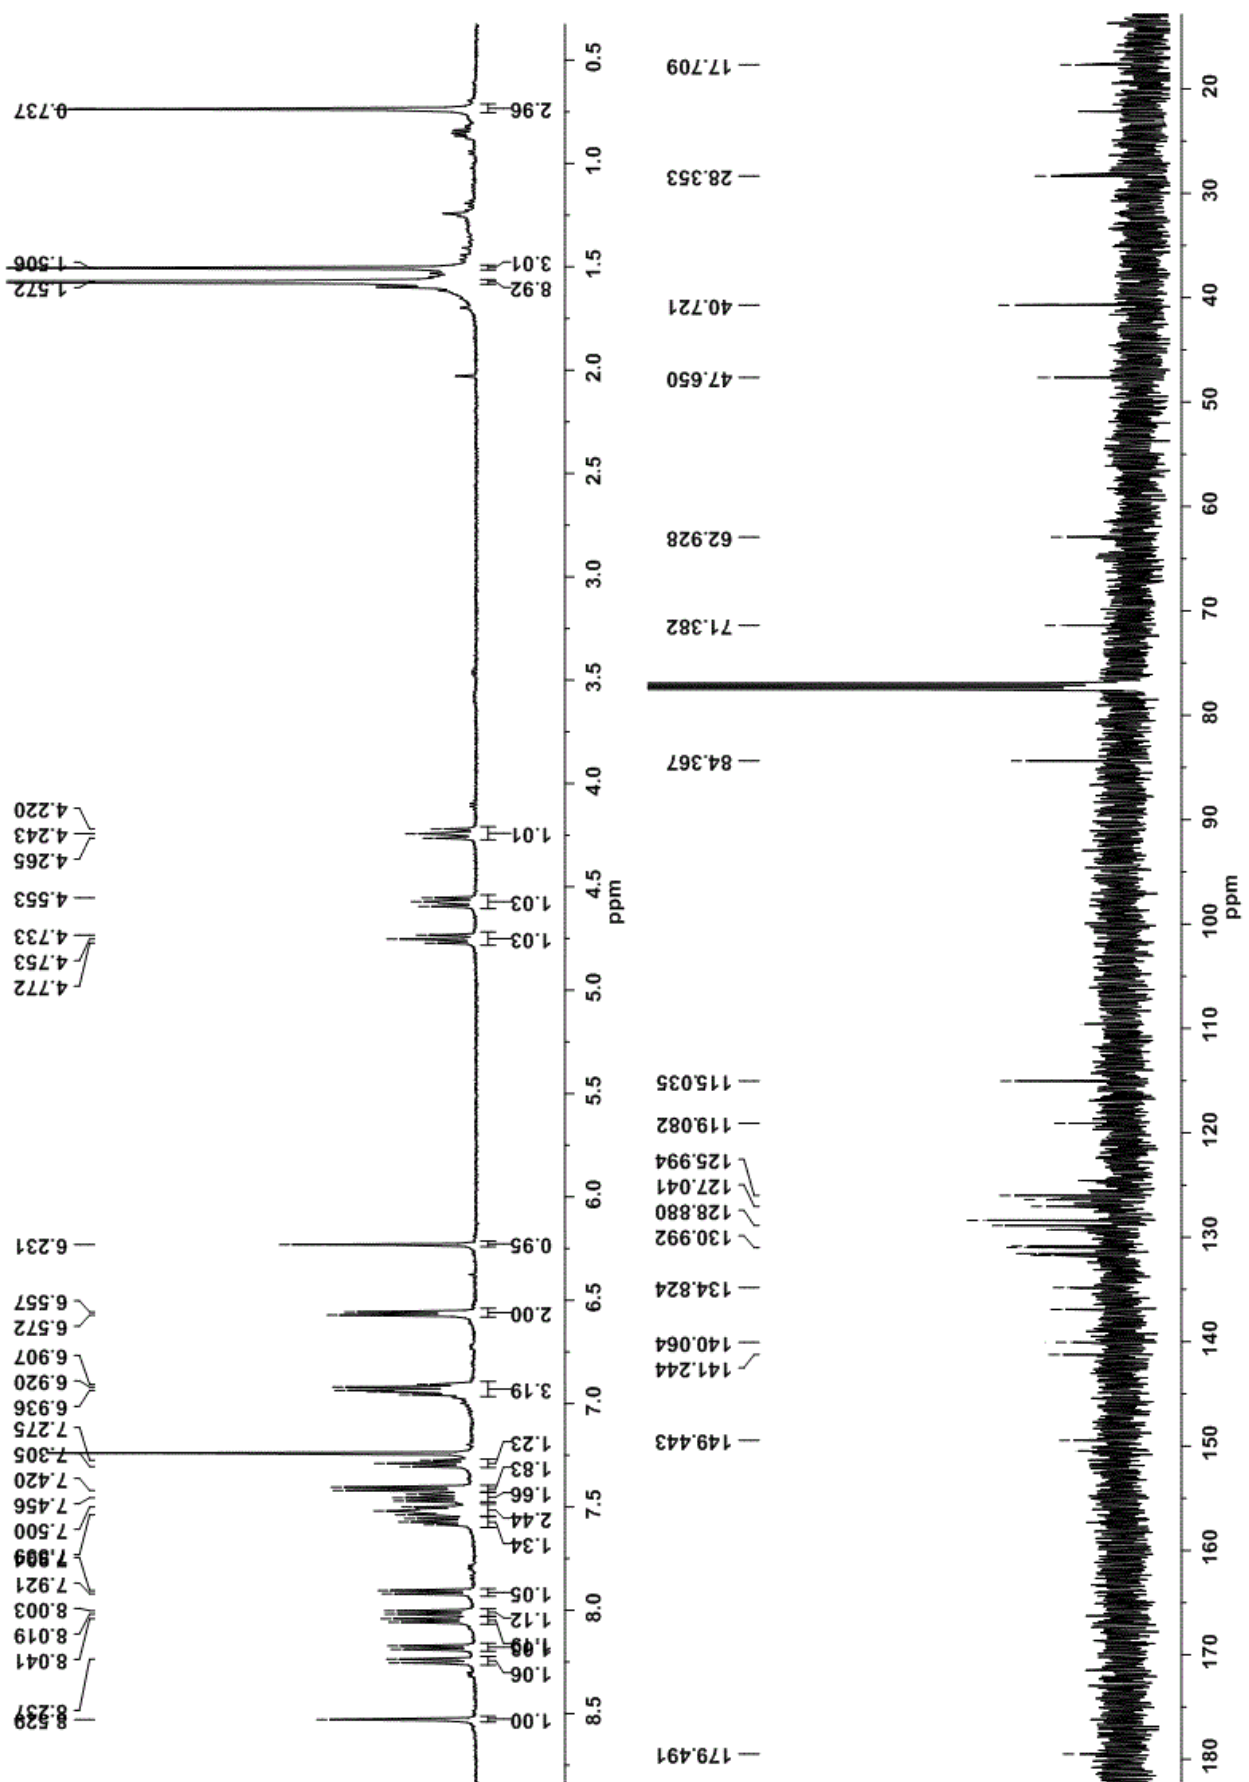

NMR-Spectra of 4i:

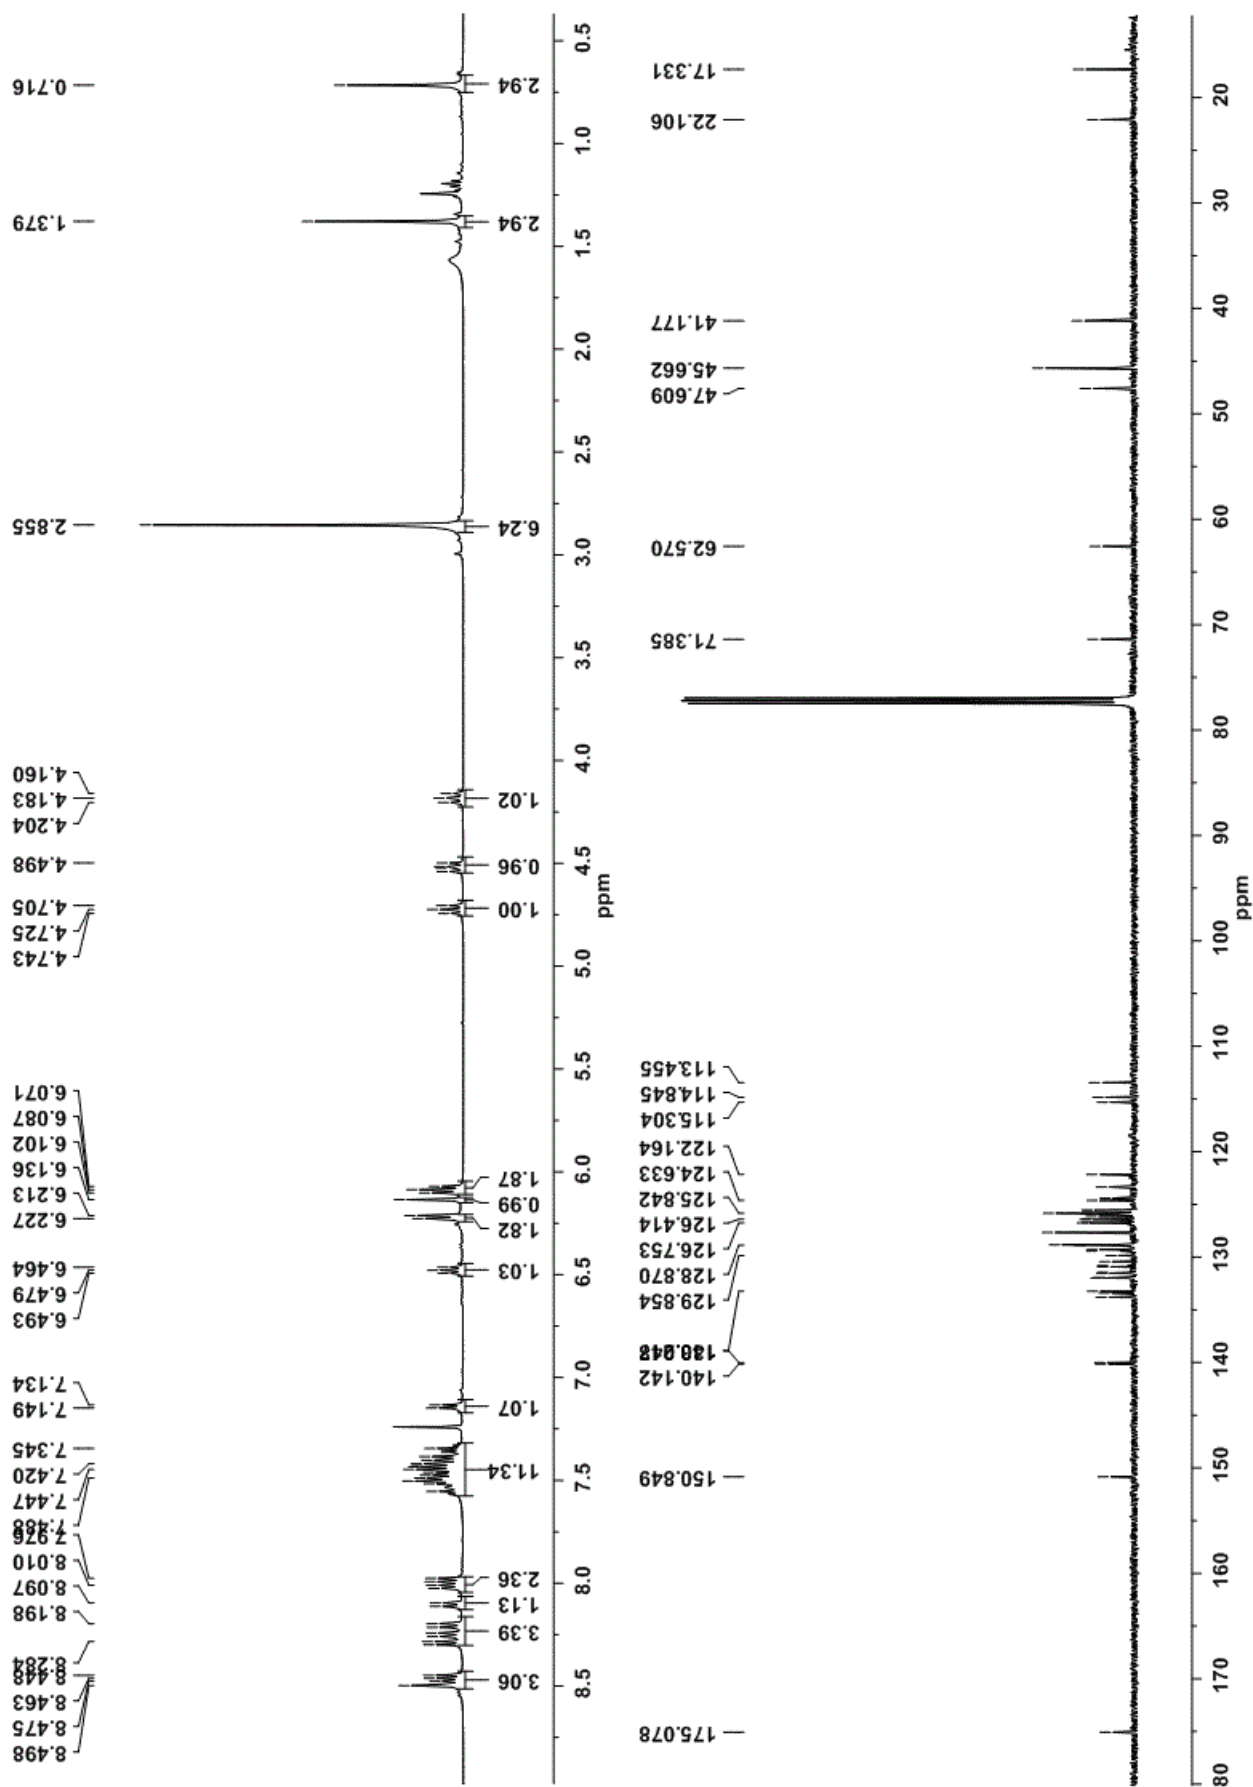

### NMR-Spectra of 4j:

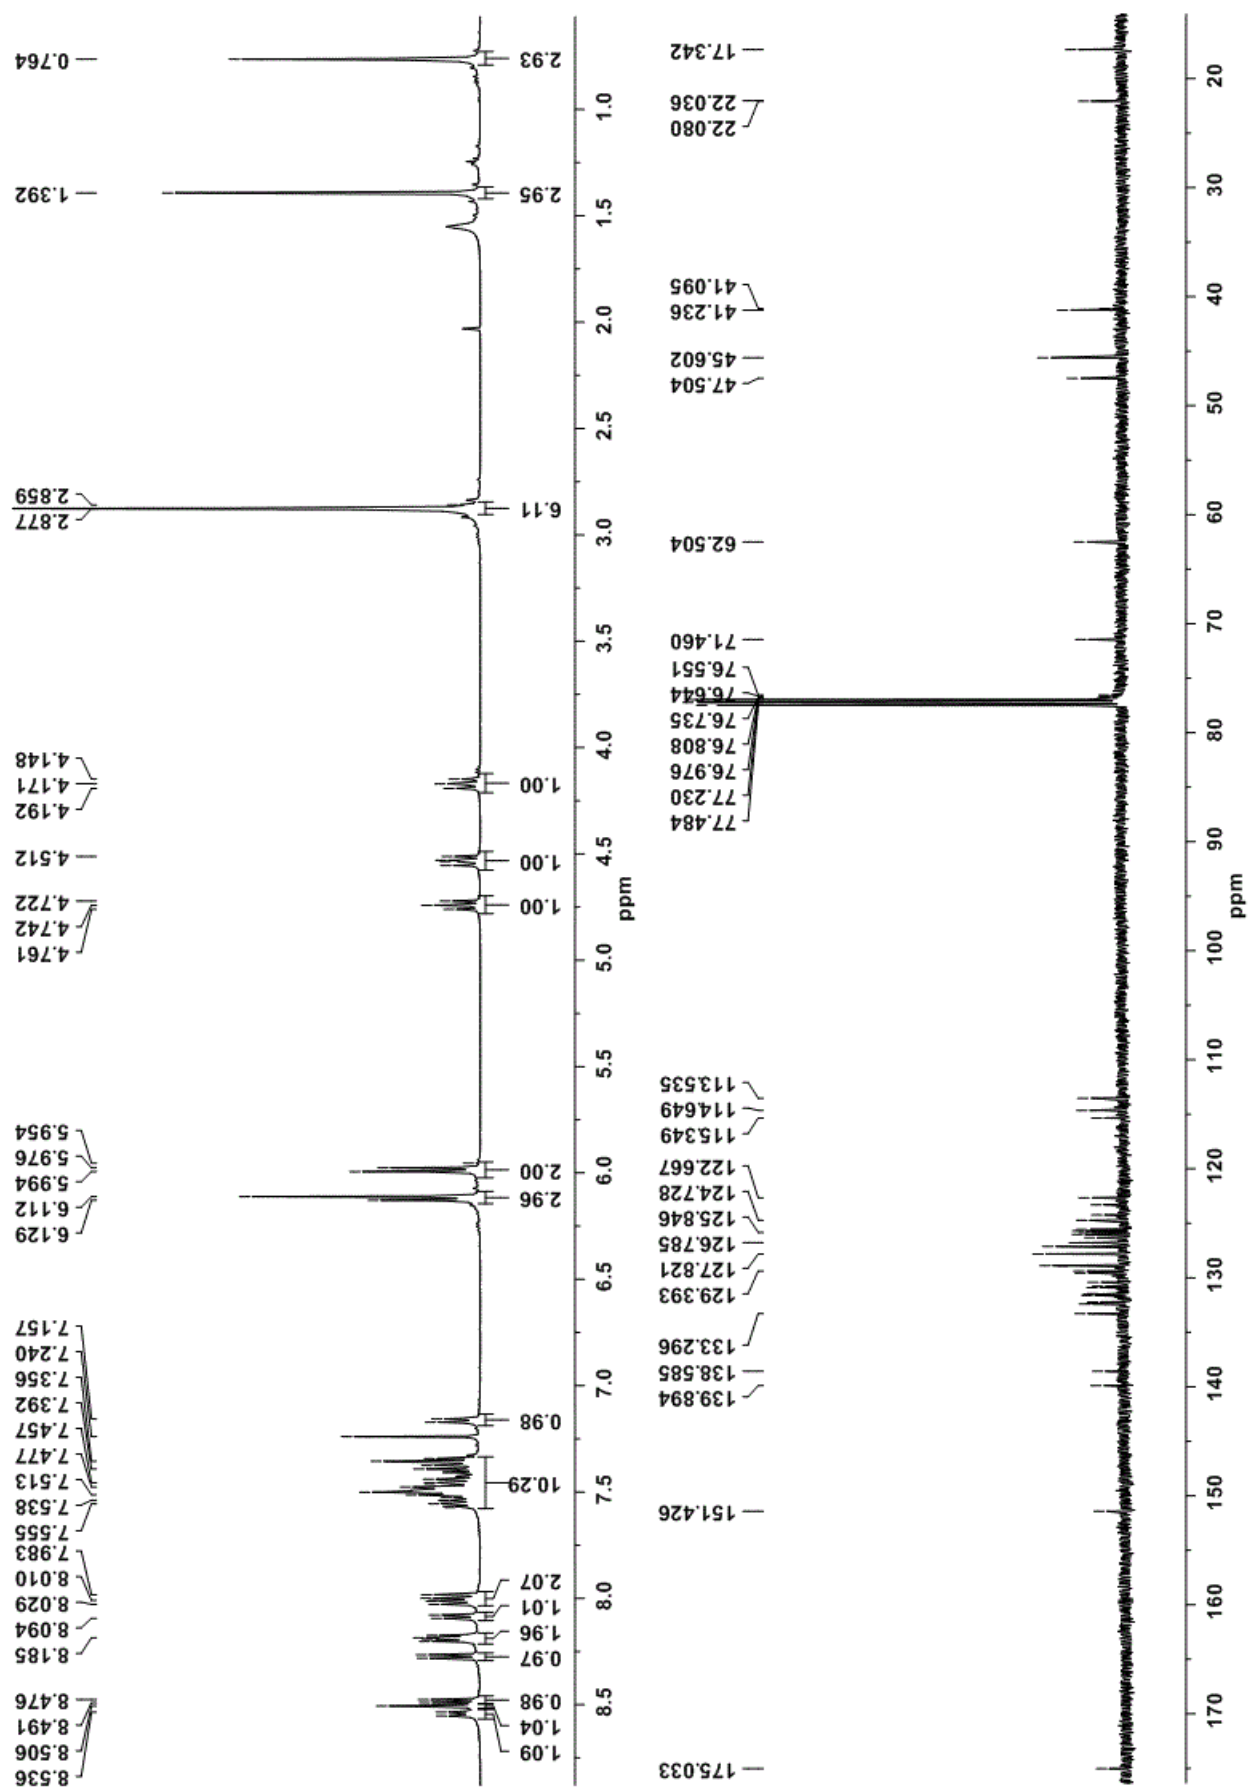

### NMR-Spectra of **4k**:

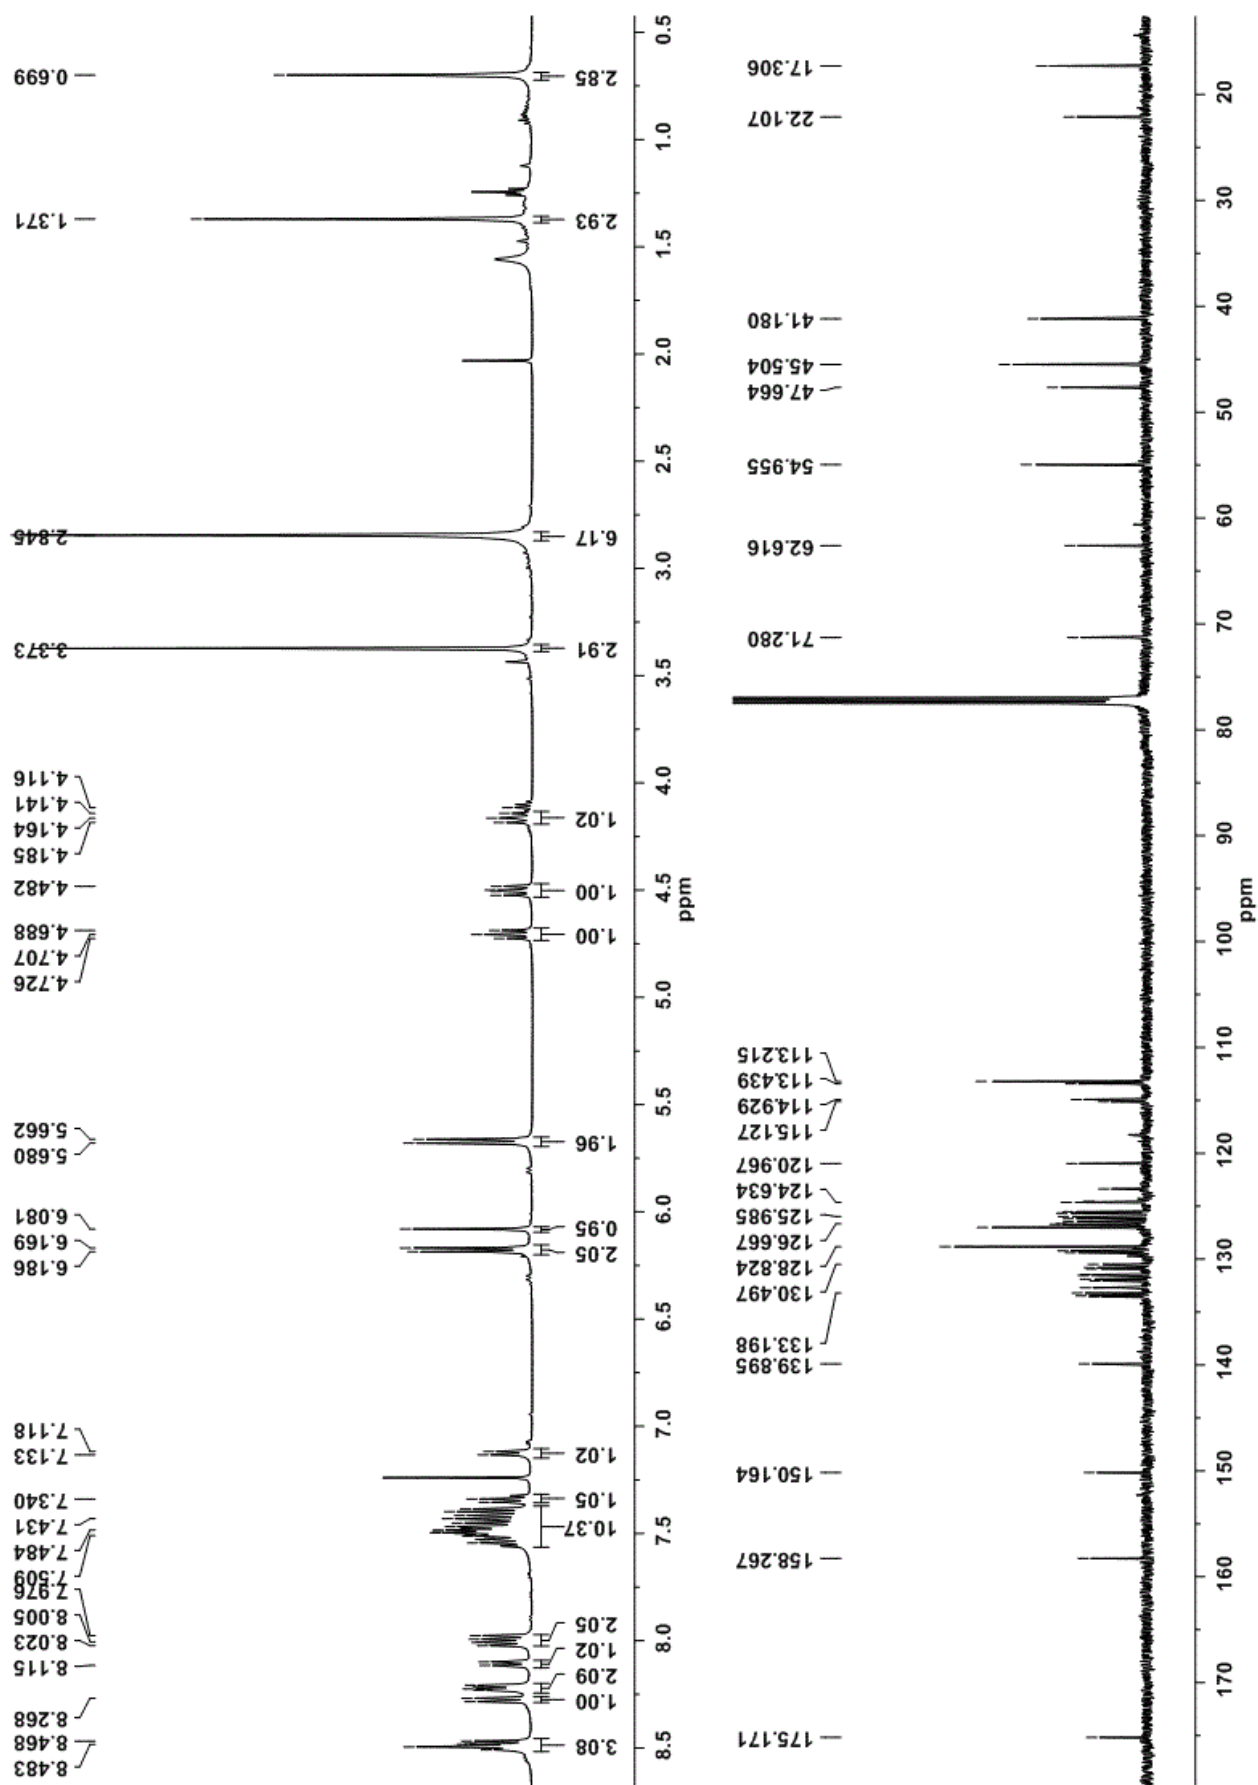



### NMR-Spectra of 4l:

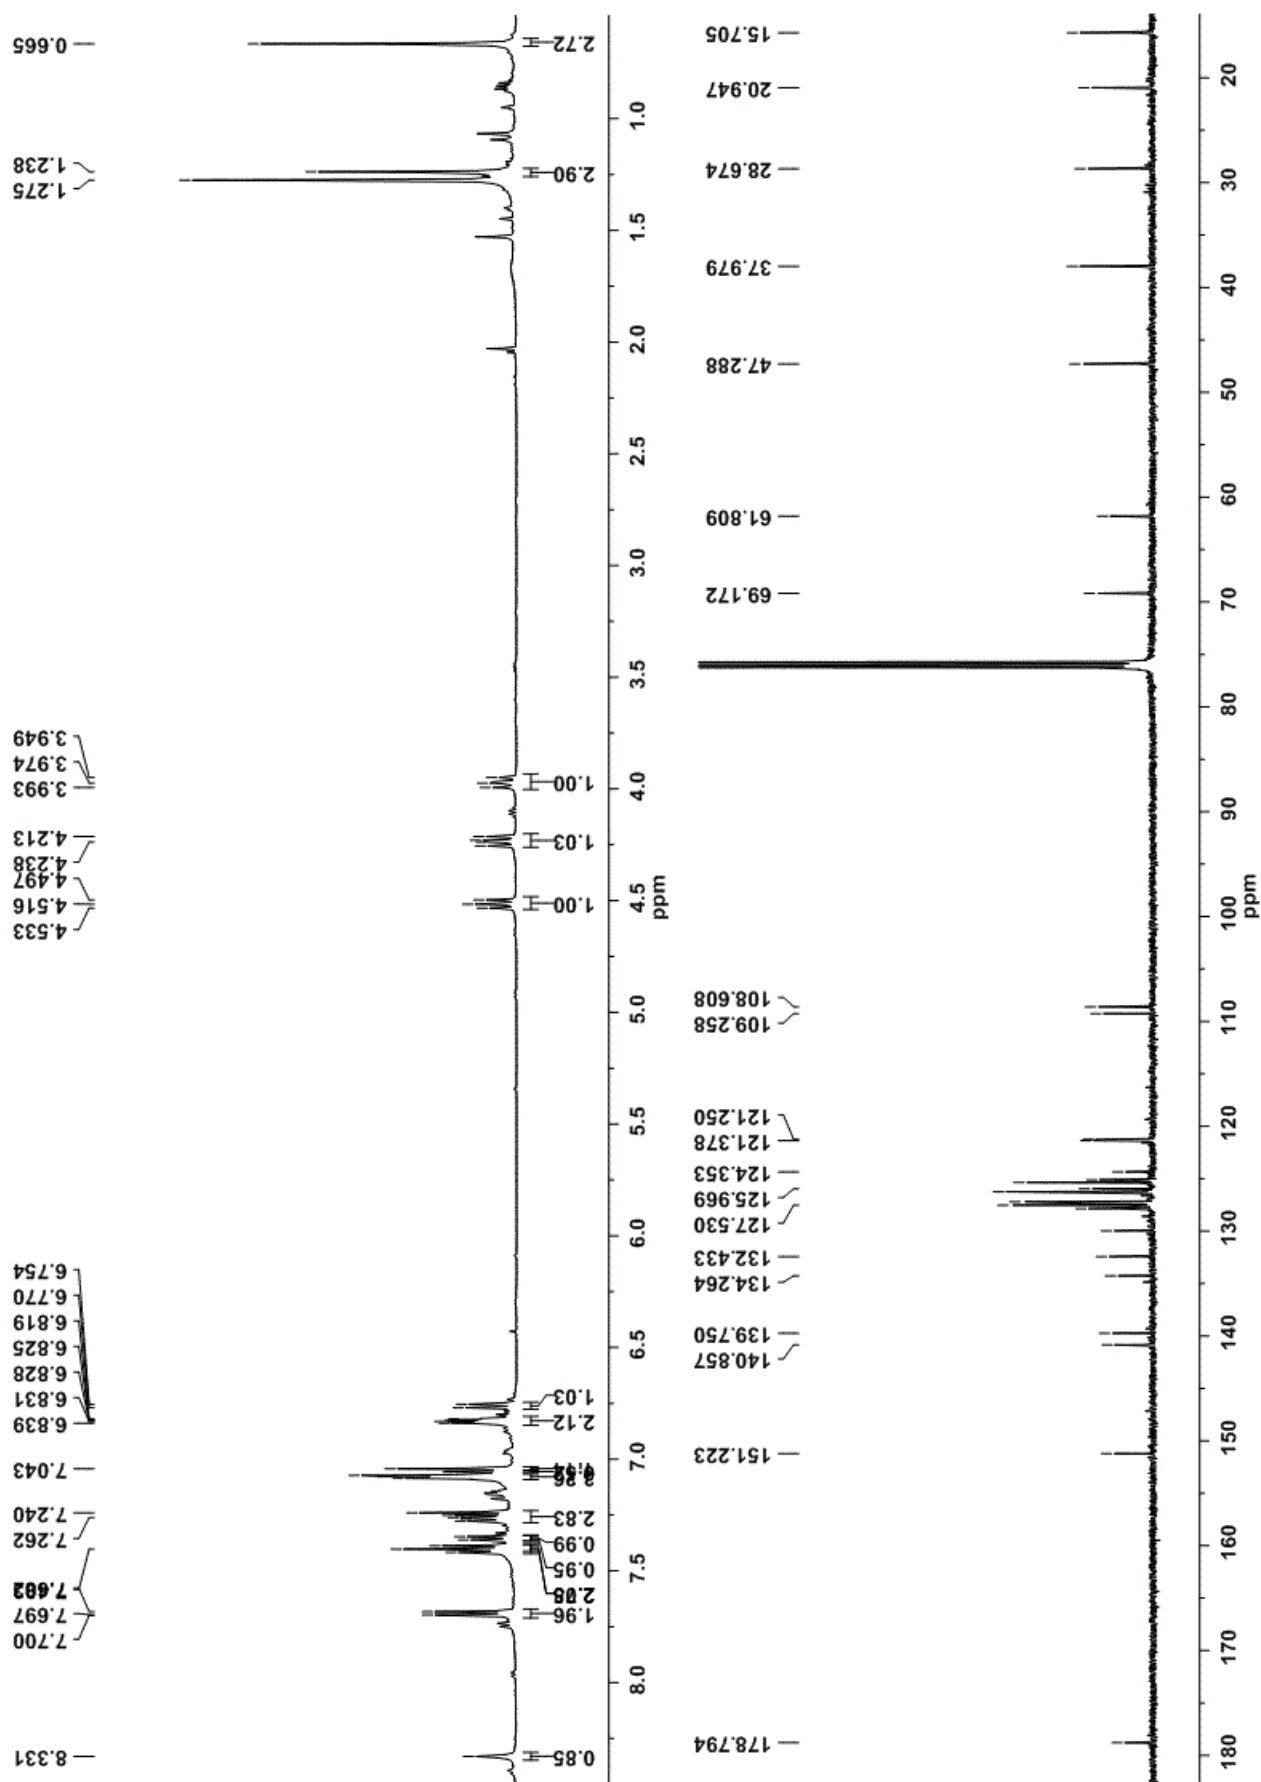

### NMR-Spectra of 4m:

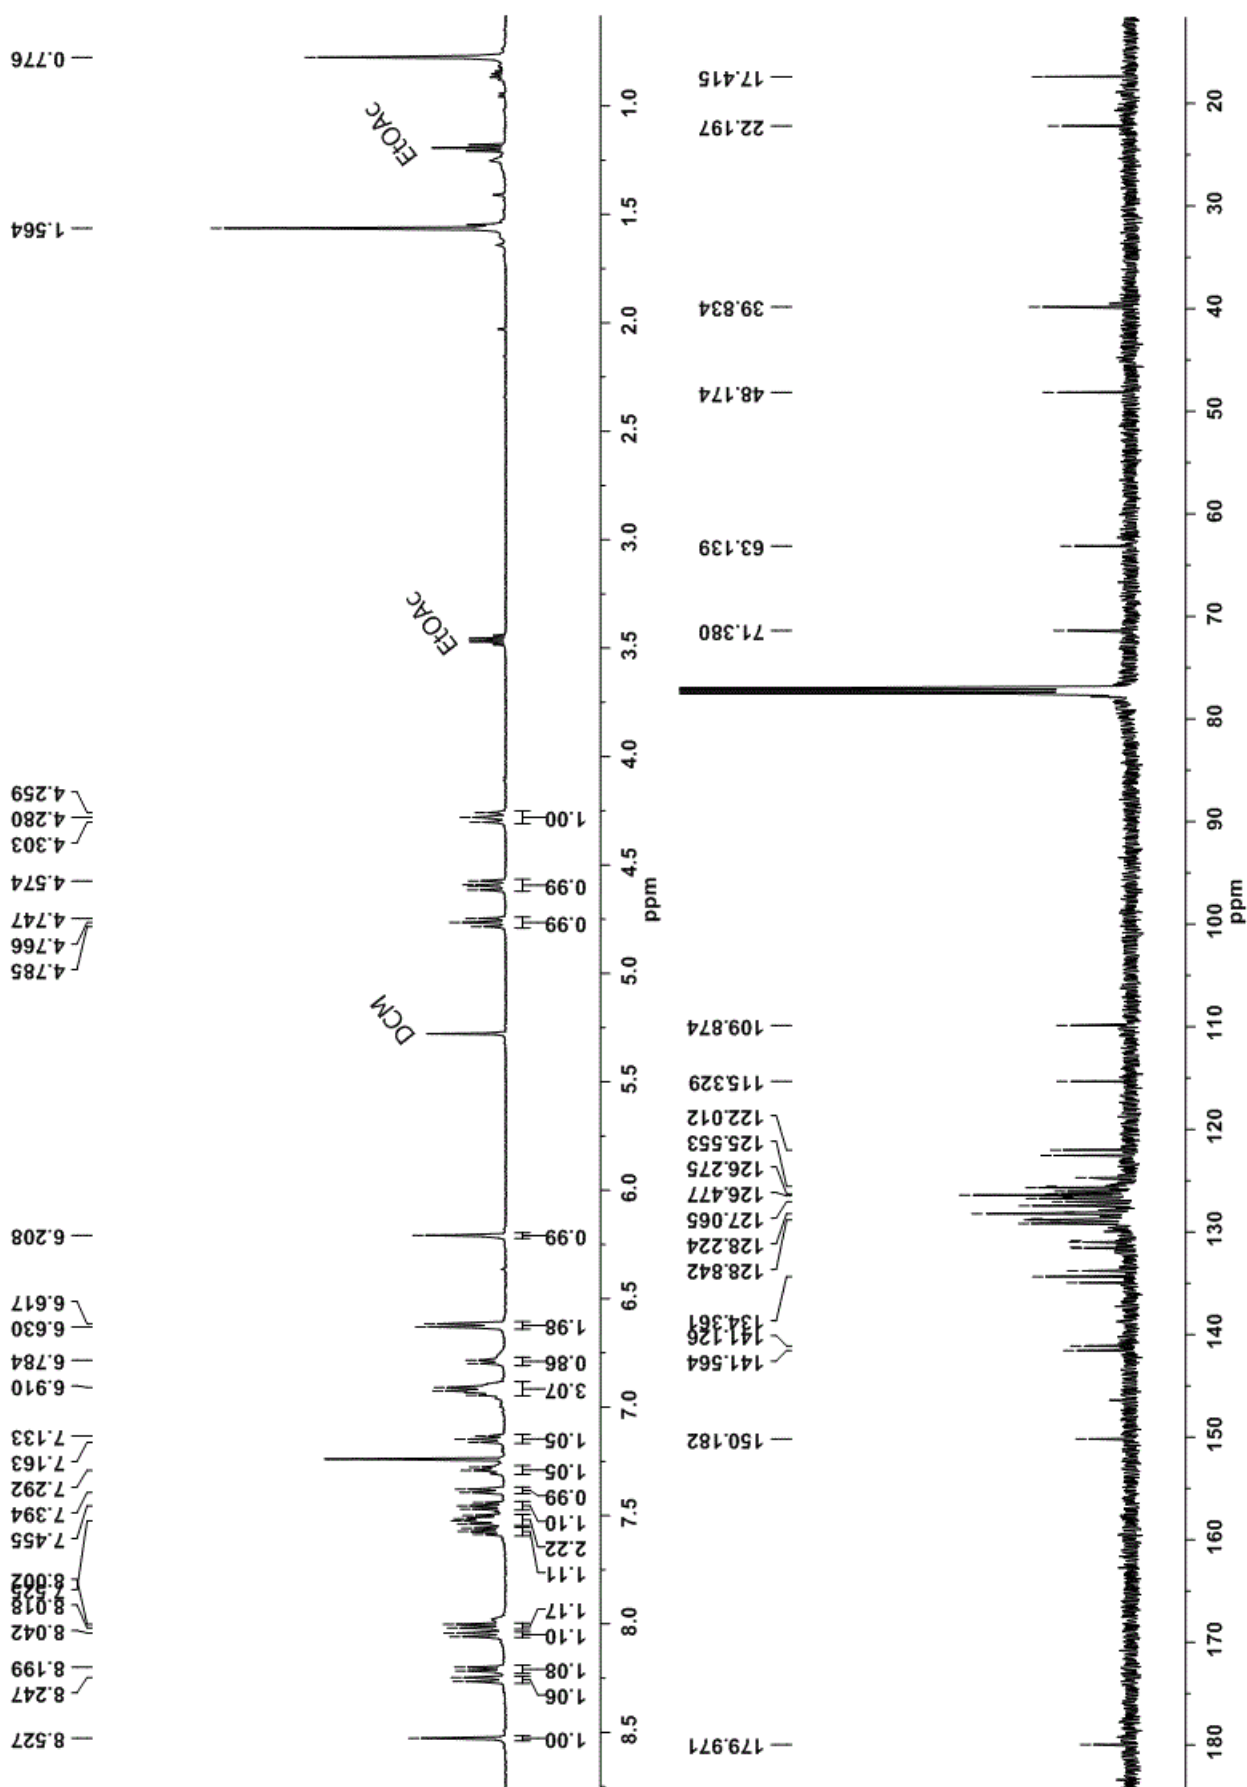

UV/VIS (blue) and Fluorescence (red) Spectra of **4a**:

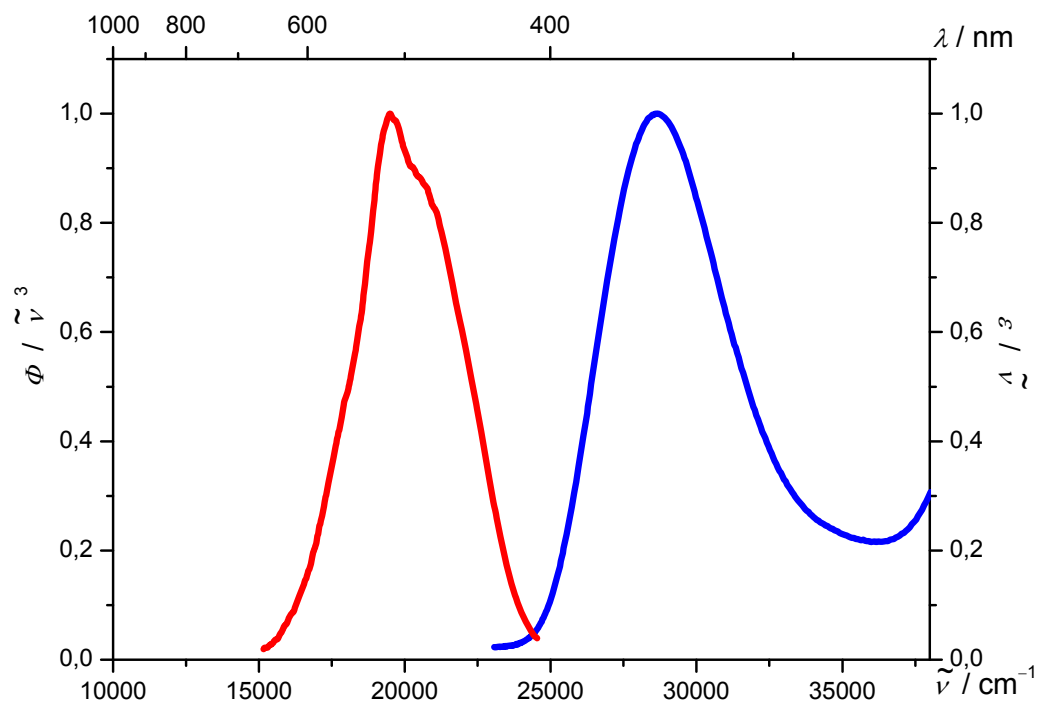

UV/VIS (blue) and Fluorescence (red) Spectra of **4b**:

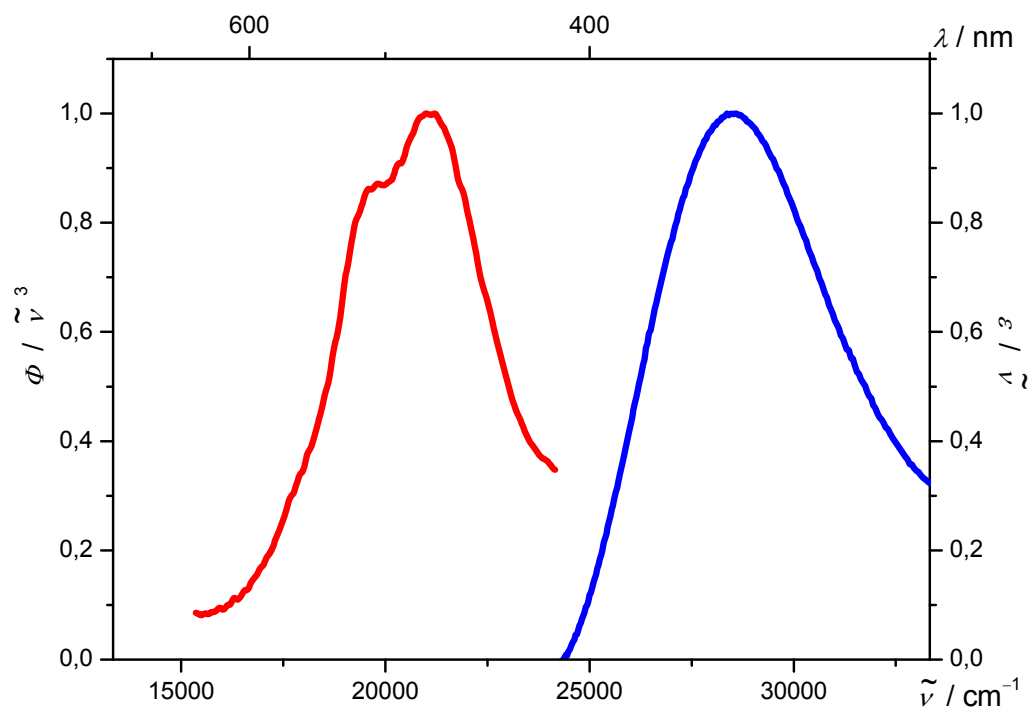

UV/VIS (blue) and Fluorescence (red) Spectra of **4c**:

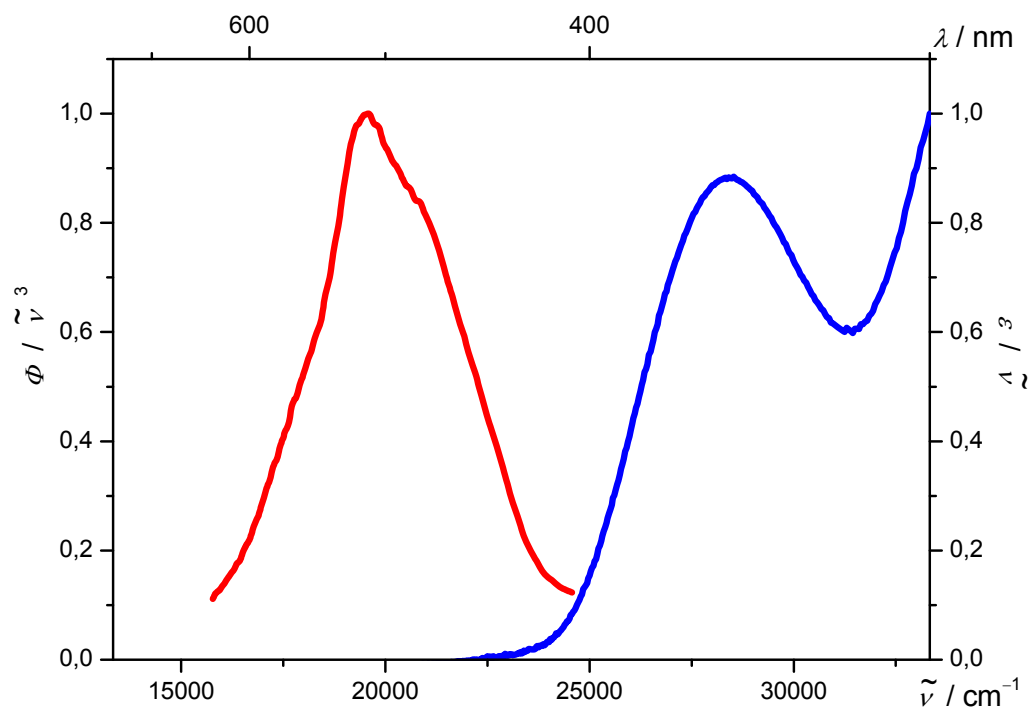

UV/VIS (blue) and Fluorescence (red) Spectra of **4d**:

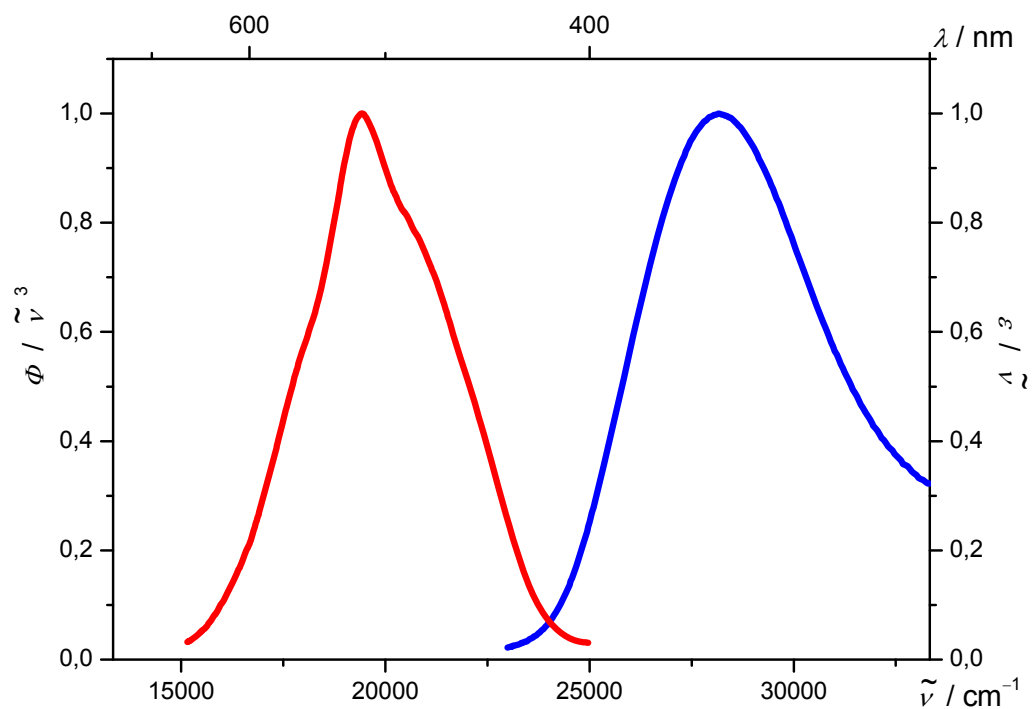

UV/VIS (blue) and Fluorescence (red) Spectra of **4e**:

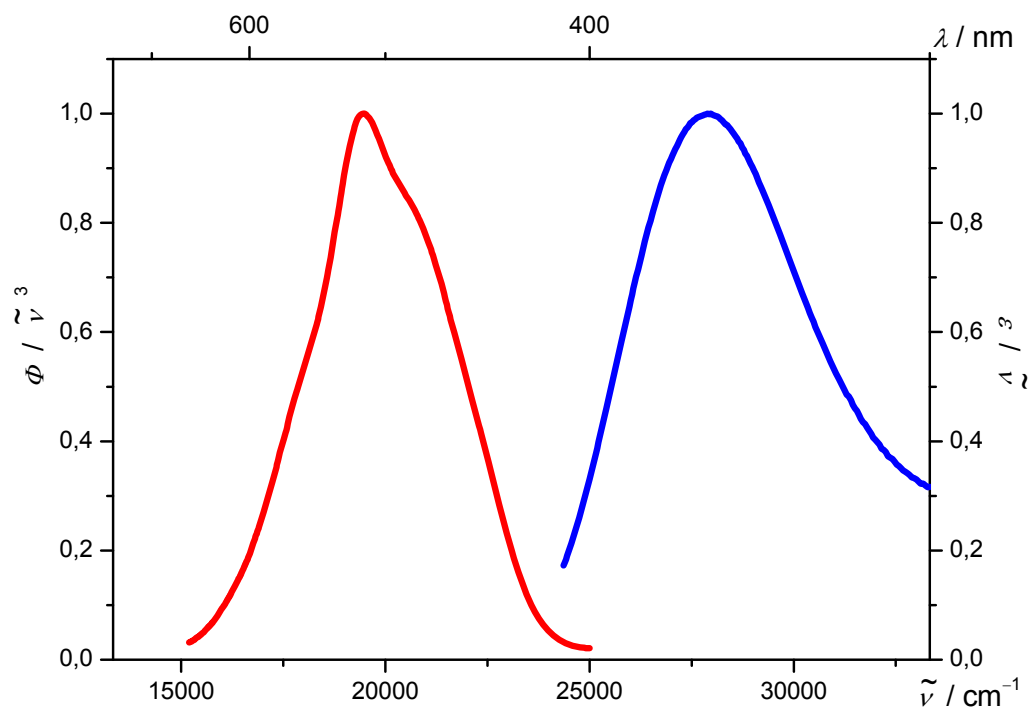

UV/VIS (blue) and Fluorescence (red) Spectra of **4f**:

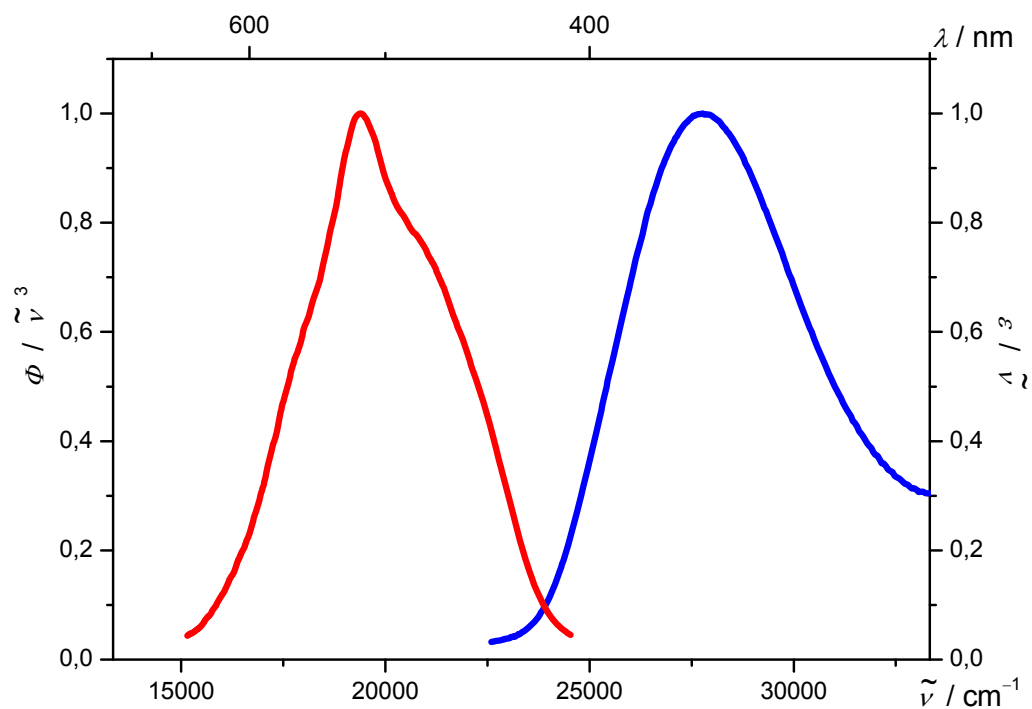

UV/VIS (blue) and Fluorescence (red) Spectra of **4g**:

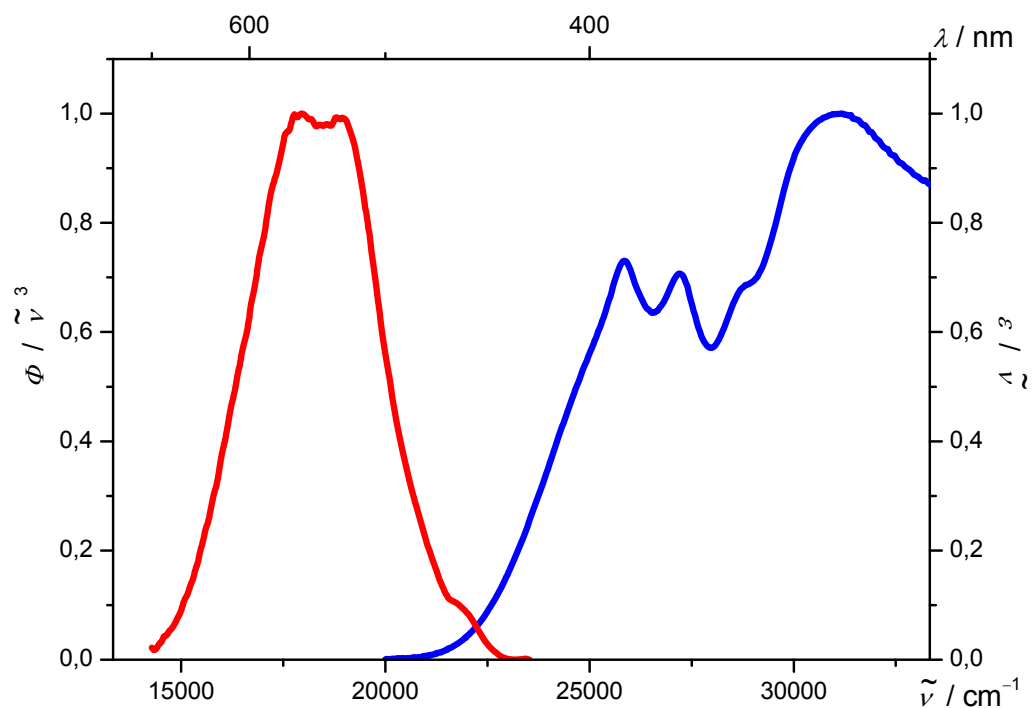

UV/VIS (blue) and Fluorescence (red) Spectra of **4h**:

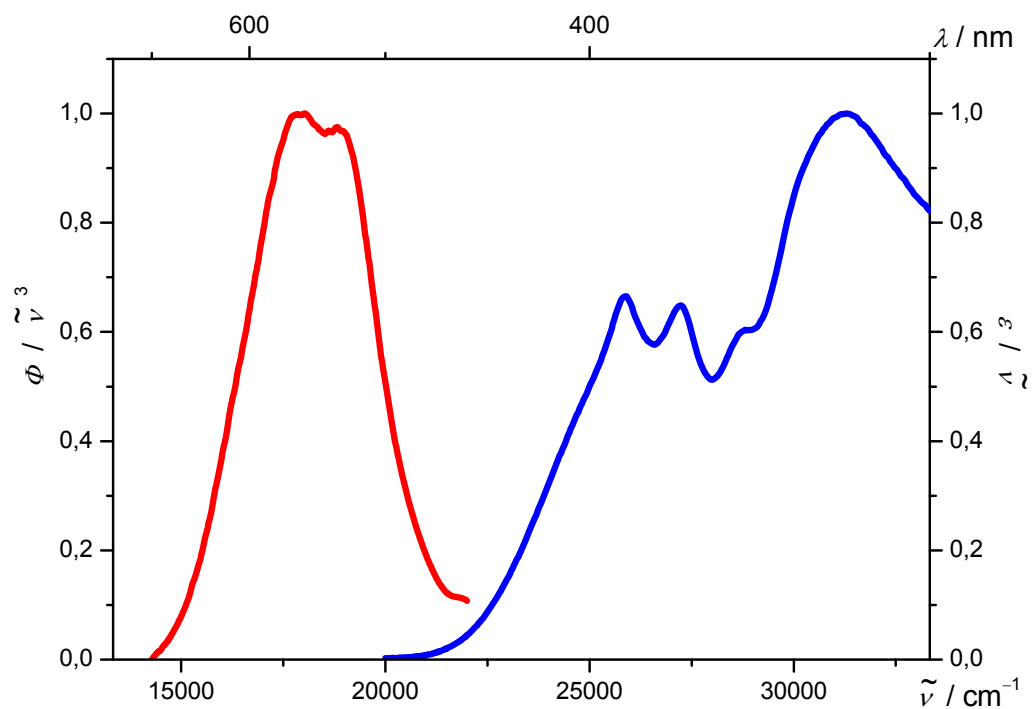

UV/VIS (blue) and Fluorescence (red) Spectra of **4i**:

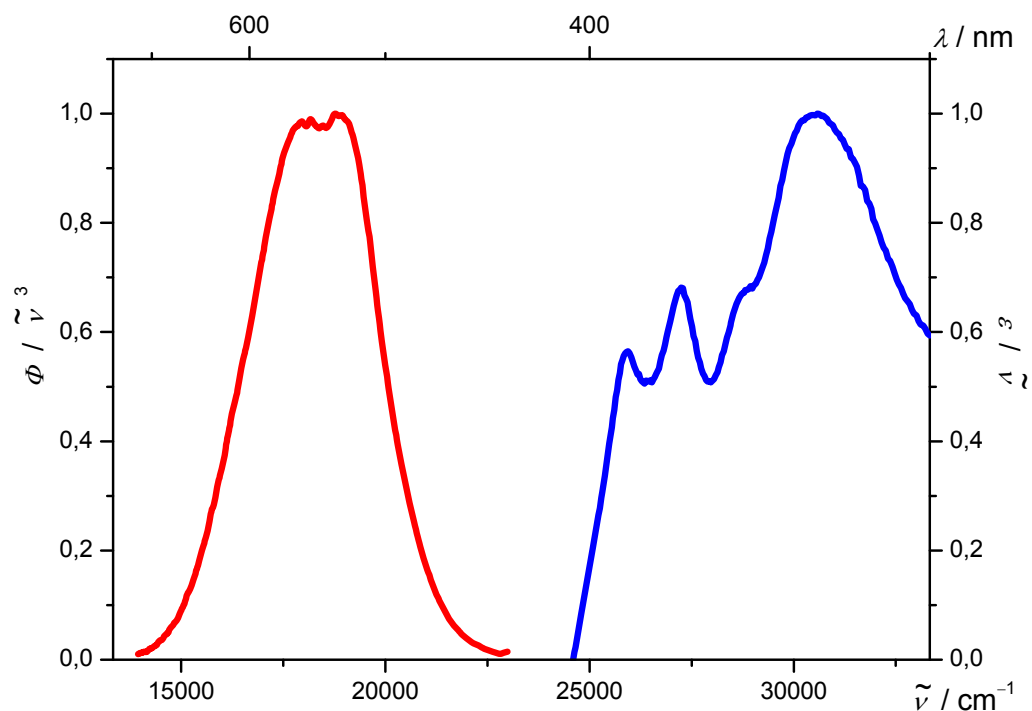

UV/VIS (blue) and Fluorescence (red) Spectra of **4j**:

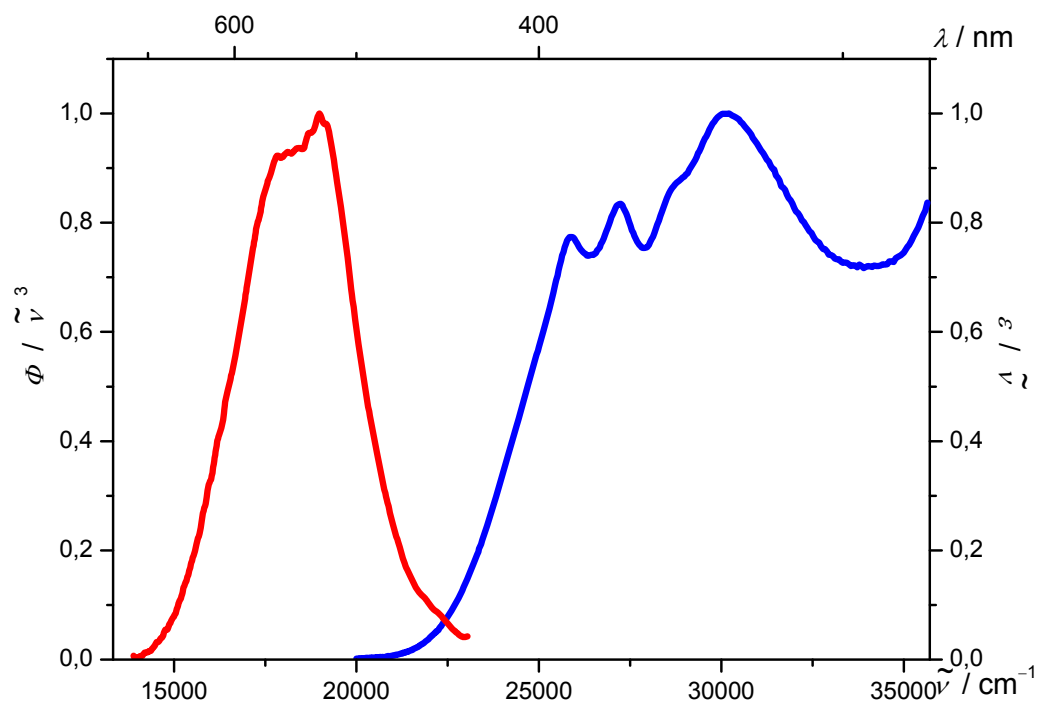

UV/VIS (blue) and Fluorescence (red) Spectra of **4k**:

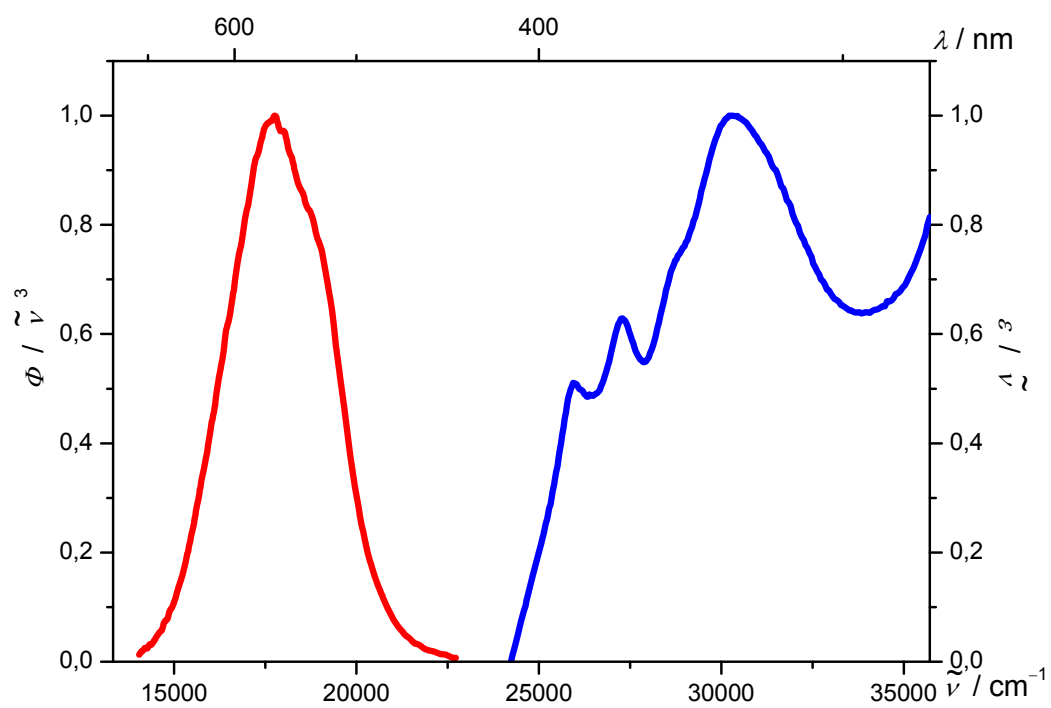

UV/VIS (blue) and Fluorescence (red) Spectra of **4l**:

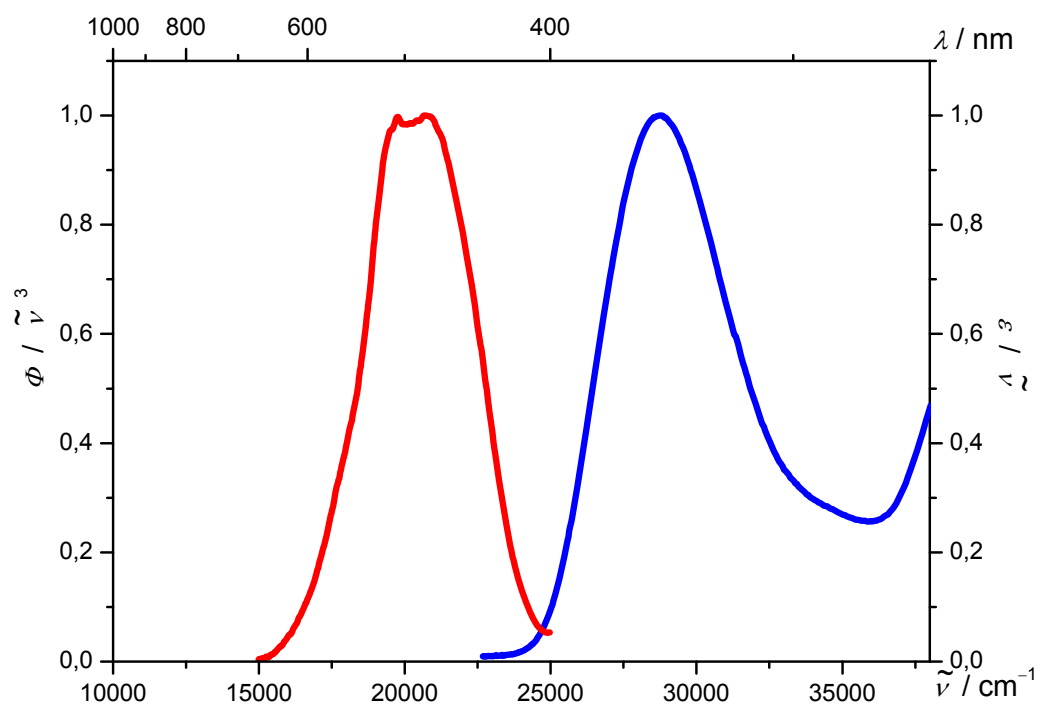



UV/VIS (blue) and Fluorescence (red) Spectra of **4m**:

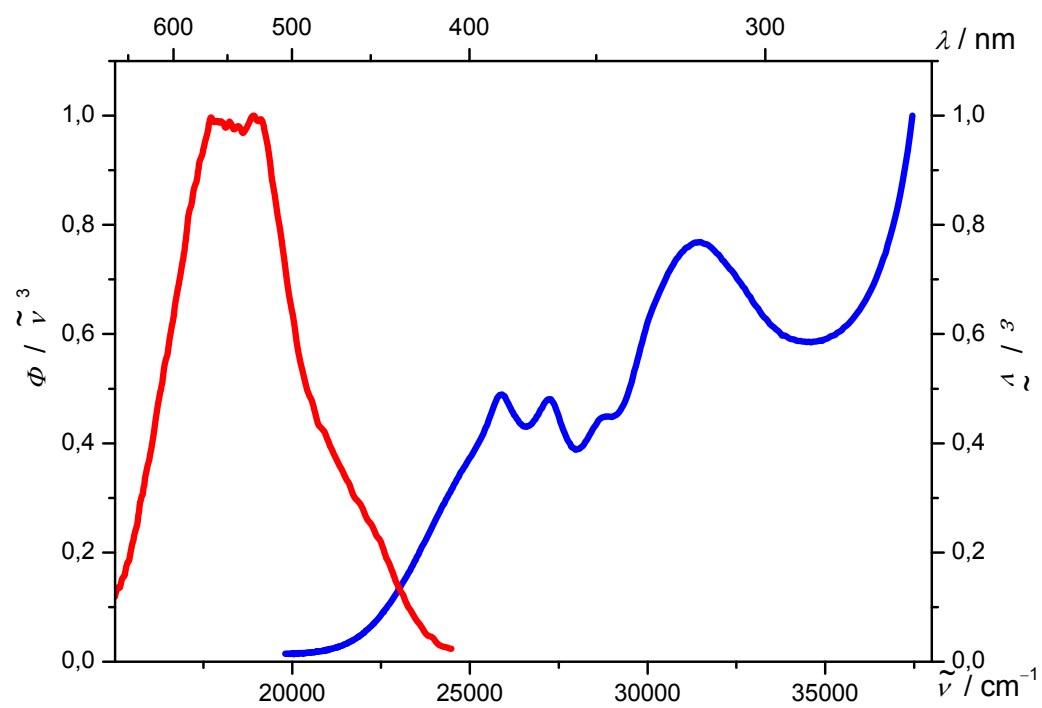

## Computational Details of the Computed Model System

Optimized ground state geometry coordinates:

|   |           |           |           |
|---|-----------|-----------|-----------|
| C | 0.827787  | 3.213501  | 0.562717  |
| C | 1.085317  | 1.883553  | 0.944669  |
| C | 2.004829  | 1.653478  | 1.985591  |
| C | 2.633199  | 2.720663  | 2.627306  |
| C | 2.361373  | 4.036665  | 2.244391  |
| C | 1.455816  | 4.278314  | 1.208262  |
| C | 0.382700  | 0.767058  | 0.257599  |
| C | 1.179102  | -0.479467 | -0.141233 |
| C | 0.504009  | -1.233725 | -1.390369 |
| C | -0.964266 | -1.498899 | -0.973476 |
| C | -1.684997 | -0.185149 | -0.659316 |
| C | -0.955590 | 0.839583  | 0.032813  |
| C | 1.380362  | -1.405147 | 1.063668  |
| C | 2.755553  | -1.690068 | 1.199095  |
| N | 3.482258  | -0.975536 | 0.240021  |
| C | 2.652831  | -0.152610 | -0.530507 |
| C | 3.231350  | -2.529073 | 2.199448  |
| C | 2.305373  | -3.078690 | 3.098027  |
| C | 0.948166  | -2.770605 | 3.003697  |
| C | 0.481692  | -1.920096 | 1.985770  |
| C | -1.908257 | -2.134717 | -2.022750 |
| O | -3.224637 | -1.459600 | -1.806910 |
| C | -2.957843 | -0.252538 | -1.131190 |
| O | 3.073516  | 0.621747  | -1.393831 |
| C | -4.109112 | 0.647501  | -1.052051 |
| C | -3.997702 | 2.021169  | -0.768069 |
| C | -5.137435 | 2.820232  | -0.689889 |
| C | -6.404552 | 2.269686  | -0.900412 |
| C | -6.523682 | 0.910781  | -1.205795 |
| C | -5.389334 | 0.108071  | -1.288348 |

|   |           |           |           |
|---|-----------|-----------|-----------|
| C | 1.228711  | -2.568903 | -1.672295 |
| C | 0.552336  | -0.337941 | -2.653228 |
| H | -7.287470 | 2.895381  | -0.837954 |
| H | 4.288158  | -2.746034 | 2.293169  |
| H | 2.656386  | -3.736151 | 3.885195  |
| H | 0.248703  | -3.177907 | 3.723841  |
| H | -0.564701 | -1.643756 | 1.946325  |
| H | -1.485122 | 1.710597  | 0.400657  |
| H | -1.590286 | -1.921884 | -3.046944 |
| H | -2.068613 | -3.203509 | -1.881951 |
| H | -0.954242 | -2.129495 | -0.076647 |
| H | 1.216489  | -3.218515 | -0.792000 |
| H | 2.268656  | -2.393783 | -1.967892 |
| H | 0.728012  | -3.086274 | -2.499526 |
| H | -0.129513 | 0.509643  | -2.549506 |
| H | 0.253817  | -0.921838 | -3.531228 |
| H | 1.560343  | 0.046795  | -2.809035 |
| H | -3.023588 | 2.473785  | -0.644060 |
| H | -5.034908 | 3.877961  | -0.475040 |
| H | -7.501848 | 0.477856  | -1.382668 |
| H | -5.467247 | -0.942395 | -1.532934 |
| H | 2.199381  | 0.639135  | 2.307725  |
| H | 3.329402  | 2.524339  | 3.435354  |
| H | 2.853210  | 4.863685  | 2.743783  |
| H | 1.250937  | 5.295195  | 0.892171  |
| H | 0.156401  | 3.401183  | -0.267337 |
| C | 4.939023  | -0.944050 | 0.107272  |
| H | 5.328474  | -1.933287 | -0.156144 |
| H | 5.152854  | -0.233627 | -0.694867 |
| H | 5.408422  | -0.602288 | 1.036837  |

Total energy = -1356.3301792299 a.u.

Optimized excited state geometry coordinates:

|   |           |           |           |
|---|-----------|-----------|-----------|
| C | 0.666439  | 3.354338  | 0.356018  |
| C | 1.181793  | 2.043590  | 0.586210  |
| C | 2.332802  | 1.940225  | 1.416197  |
| C | 2.922040  | 3.066028  | 1.974558  |
| C | 2.397839  | 4.343109  | 1.732049  |
| C | 1.266385  | 4.473468  | 0.916396  |
| C | 0.535834  | 0.880249  | 0.012260  |
| C | 1.260775  | -0.446343 | -0.201018 |
| C | 0.673060  | -1.196540 | -1.500617 |
| C | -0.823666 | -1.459504 | -1.205076 |
| C | -1.538600 | -0.184611 | -0.788493 |
| C | -0.844180 | 0.903841  | -0.271516 |
| C | 1.197648  | -1.311151 | 1.061833  |
| C | 2.501564  | -1.733544 | 1.395443  |
| N | 3.422212  | -1.176760 | 0.495969  |
| C | 2.798839  | -0.332833 | -0.428842 |
| C | 2.747161  | -2.549098 | 2.493286  |
| C | 1.657250  | -2.935828 | 3.286141  |
| C | 0.365701  | -2.495968 | 2.989454  |
| C | 0.131872  | -1.673819 | 1.875045  |
| C | -1.706072 | -1.919626 | -2.390942 |
| O | -3.059700 | -1.339278 | -2.087956 |
| C | -2.906944 | -0.291698 | -1.188545 |
| O | 3.409975  | 0.291565  | -1.301680 |
| C | -4.061727 | 0.450844  | -0.838332 |
| C | -4.084223 | 1.328937  | 0.293700  |
| C | -5.230200 | 2.047596  | 0.597890  |
| C | -6.384902 | 1.935631  | -0.193390 |
| C | -6.383761 | 1.056588  | -1.297516 |
| C | -5.257329 | 0.322616  | -1.614319 |
| C | 1.405404  | -2.538148 | -1.729128 |
| C | 0.849635  | -0.286007 | -2.742867 |

|   |           |           |           |
|---|-----------|-----------|-----------|
| H | -7.271137 | 2.510949  | 0.046806  |
| H | 3.751459  | -2.872385 | 2.737988  |
| H | 1.826738  | -3.572210 | 4.147096  |
| H | -0.463089 | -2.783930 | 3.625208  |
| H | -0.864960 | -1.304856 | 1.666818  |
| H | -1.392610 | 1.817250  | -0.075786 |
| H | -1.370718 | -1.497527 | -3.340297 |
| H | -1.847814 | -2.997311 | -2.463848 |
| H | -0.893304 | -2.214951 | -0.409098 |
| H | 1.381204  | -3.156546 | -0.826648 |
| H | 2.446433  | -2.366771 | -2.021284 |
| H | 0.917173  | -3.086907 | -2.544028 |
| H | 0.152985  | 0.555232  | -2.711557 |
| H | 0.670637  | -0.863484 | -3.657511 |
| H | 1.868363  | 0.104122  | -2.767076 |
| H | -3.218980 | 1.387744  | 0.942786  |
| H | -5.235161 | 2.698638  | 1.466112  |
| H | -7.277913 | 0.955172  | -1.903390 |
| H | -5.252715 | -0.353806 | -2.459529 |
| H | 2.727206  | 0.962590  | 1.653650  |
| H | 3.789315  | 2.952024  | 2.615725  |
| H | 2.863229  | 5.219105  | 2.168681  |
| H | 0.861292  | 5.457692  | 0.707471  |
| H | -0.178117 | 3.484591  | -0.309659 |
| C | 4.872480  | -1.372615 | 0.509885  |
| H | 5.124318  | -2.426579 | 0.349802  |
| H | 5.267226  | -0.767404 | -0.309755 |
| H | 5.303536  | -1.035695 | 1.459226  |

total energy = -1356.31961252100 a.u.

<sup>1</sup> D. M. D'Souza, F. Rominger and T. J. J. Müller, *Angew. Chem. Int. Ed.*, 2005, **44**, 153; D. M. D'Souza, A. Kiel, D.-P. Herten, F. Rominger and T. J. J. Müller, *Chem. Eur. J.*, 2008, **14**, 529.
